# Supplementary material for: Ultra-high power efficiency organic light-emitting diodes based on hot-exciton-assisted exciplex (HEAE) system
Source: Research Square preprint supplement (doi:10.21203/rs.3.rs-6904824/v1), 2025-07-02
Supplement: Supplementary file 1 [file 936b1796b0ae4dc363b4a9c1.docx]

***Supporting information for***

**Ultra-high power efficiency organic light-emitting diodes based on hot-exciton-assisted exciplex (HEAE) system**

Jingli Lou, Junwei He, Baoxi Li, Yichao Chen, Han Zhang*, Ben Zhong Tang, Zhiming Wang*

**Table of Contents**

**1. Synthesis and characterization............................................................................................3**

**2. Photophysical properties of hot-exciton materials.............................................................6**

**3. Computational results...........................................................................................................7**

**4. Electrochemical and thermal stability measurements.......................................................9**

# 5. Photophysical properties of exciplexes...............................................................................9

**6.** **Exciton and carrier dynamics............................................................................................12**

**7. Sensitization performances................................................................................................13**

**8. NMR spectroscopy..............................................................................................................14**

**9. References............................................................................................................................16**

# Synthesis and Characterization:

**Scheme S1.** Molecular structure and synthetic route of 2*t*-2MCz-CNMCz and 4*t*-2MCz-CNMCz.

4-(2,7-dibromo-9H-carbazol-9-yl)-3-methylbenzonitrile (**1**): 3-methy-4-fluoro benzonitrile (4.05 g, 30 mmol), 2,7-Dibromo-9H-Carbazole (8.13 g, 25 mmol) and K2CO3 (10.37 g, 75 mmol) were were stirred for 30 min in deaerated and dehydrated N,Ndimethylformamide (50 mL) under nitrogen at room temperature; Then the reaction mixture was heated up to 150 °C and reacted for 12 h. After cooled to room temperature, the reaction mixture was poured into a large amount of water and extracted twice with dichloromethane. After the solvent was evaporated under reduced pressure, the residue was purified by column chromatography on silica-gel (dichloromethane/petroleum) to afford white solid of 2Br-CNCz in 82% yield. 1H NMR (500 MHz, CD2Cl2), δ (TMS, ppm): 8.01 (d, *J* = 8.3 Hz, 2H), 7.83 (d, J = 1.1 Hz, 1H), 7.75 (dd, J = 8.1, 1.9 Hz, 1H), 7.48 (d, J = 8.1 Hz, 1H), 7.44 (dd, J = 8.3, 1.7 Hz, 2H), 7.16 (d, J = 1.6 Hz, 2H), 2.01 (s, 3H). 13C NMR (125 MHz, CD2Cl2), δ (TMS, ppm): 142.86, 140.38, 140.33, 137.00, 132.84, 131.53, 125.21, 123.12, 123.10, 121.45, 119.38, 114.73, 114.17, 18.60. HRMS (C20H12Br2N2): m/z 439.9347 (M+, calcd 439.9447).

(9-(4-(tert-butyl)phenyl)-9H-carbazol-3-yl)boronic acid (**2**): 3-bromo-9H-carbazole (1.48 g, 6 mmol), 1-(tert-butyl)-4-iodobenzene (1.82 g, 7.2 mmol), acetic acid (2.28 g, 7.2 mmol), and PdCl2(dppf) ( 0.2g, 0.3 mmol) were placed in a 100 mL round bottom flask and stirred for 30 min under nitrogen at room temperature. Then 50 mL 1,4-dioxane was injected into the bottle, and the reaction mixture reﬂuxed for 12 h under a nitrogen atmosphere. After cooled to room temperature, the reaction mixture was poured into a large amount of water and extracted twice with DCM. evaporated this reaction solution under reduced pressure. After the solvent was evaporated under reduced pressure, the residue was purified by column chromatography on silica-gel (dichloromethane/petroleum) to afford white solid of 1.5 g in 73% yield. 1H NMR (500 MHz, CD2Cl2) δ 8.98 (d, *J* = 2.0 Hz, 1H), 8.84–8.80 (m, 1H), 8.37–8.34 (m, 2H), 8.23–8.10 (m, 5H), 8.02 (dd, *J* = 6.3, 5.0 Hz, 2H), 2.25 (s, 1H), 2.14 (s, 9H).

3-bromo-9-(3,5-di-tert-butylphenyl)-9H-carbazole (**3**): 3-bromo-9H-carbazole (1.48 g, 6 mmol), 1,3-di-tert-butyl-5-iodobenzene (2.28 g, 7.2 mmol), acetic acid (2.28 g, 7.2 mmol), and PdCl2(dppf) ( 0.2g, 0.3 mmol) were placed in a 100 mL round bottom flask and stirred for 30 min under nitrogen at room temperature. Then 50 mL 1,4-dioxane was injected into the bottle, and the reaction mixture reﬂuxed for 12 h under a nitrogen atmosphere. After cooled to room temperature, the reaction mixture was poured into a large amount of water and extracted twice with DCM. evaporated this reaction solution under reduced pressure. After the solvent was evaporated under reduced pressure, the residue was purified by column chromatography on silica-gel (dichloromethane/petroleum) to afford white solid of 1.7 g in 65% yield. 1H NMR (400 MHz, CD2Cl2) δ 8.27 (d, *J* = 1.5 Hz, 1H), 8.10 (d, *J* = 7.8 Hz, 1H), 7.56–7.25 (m, 7H), 1.55–1.21 (m, 19H).

4-(9,9''-bis(4-(*tert*-butyl)phenyl)-9*H*,9'*H*,9''*H*-[3,2':7',3''-tercarbazol]-9'-yl)-3-methylbenzonitrile (**2*t*-2MCz-CNMCz**): A mixture of compound 4-(2,7-dibromo-9H-carbazol-9-yl)-3-methylbenzonitrile (0.44 g, 1 mmol), (9-(4-(tert-butyl)phenyl)-9H-carbazol-3-yl)boronic acid ( 1.03 g, 3 mmol), Pd(PPh3)4 (0.12 g, 0.1 mmol) and K2CO3 (0.48 g, 3.5 mmol) was added in 250 mL two-neck bottle under nitrogen. Then, a mixed solvent system of toluene, C2H5OH and H2O (v/v/v = 8:1:1) was injected into the bottle, and the reaction mixture was refluxed for 7 h. After cooling to room temperature, the mixture was poured into water and extracted twice with dichloromethane, and then dried over anhydrous magnesium sulfate. After filtration, the solvent was evaporated under reduced pressure and the residue was purified by silica-gel column chromatography (dichloromethane/petroleum). White solid of 2MCz-CNMCz was obtained 0.48 g in 55% yield. 1H NMR (500 MHz, CD2Cl2) δ 8.50–8.16 (m, 6H), 7.98–7.58 (m, 11H), 7.54–7.26 (m, 13H), 1.66–1.18 (m, 22H). 13C NMR (101 MHz, CD2Cl2) δ 126.85 (s), 126.78–126.38 (m), 126.24 (d, *J* = 20.6 Hz), 125.66 (s), 120.71 (s), 120.27 (s), 119.94 (s), 118.87 (s), 110.12 (s), 107.91 (s), 53.99 (s), 53.72 (s), 53.45 (s), 53.18 (s), 52.91 (s), 34.70 (s), 31.15 (s), 17.70 (s), -0.41 (s). MALDI-TOF-MS (*m/z*): calcd for C64H52N4, 876.419; found, 899.4086.

4-(9,9''-bis(3,5-di-*tert*-butylphenyl)-9*H*,9'*H*,9''*H*-[3,2':7',3''-tercarbazol]-9'-yl)-3-methylbenzonitrile (**4*t*-2MCz-CNMCz**): A mixture of compound 4-(2,7-dibromo-9H-carbazol-9-yl)-3-methylbenzonitrile ( 0.44 g, 1 mmol), (9-(3,5-di-tert-butylphenyl)-9H-carbazol-3-yl)boronic acid ( 1.20 g, 3 mmol), Pd(PPh3)4 (0.12 g, 0.1 mmol) and K2CO3 (0.48 g, 3.5 mmol) was added in 250 mL two-neck bottle under nitrogen. Then, a mixed solvent system of toluene, C2H5OH and H2O (v/v/v = 8:1:1) was injected into the bottle, and the reaction mixture was refluxed for 7 h. After cooling to room temperature, the mixture was poured into water and extracted twice with dichloromethane, and then dried over anhydrous magnesium sulfate. After filtration, the solvent was evaporated under reduced pressure and the residue was purified by silica-gel column chromatography (dichloromethane/petroleum). White solid of 2MCz-CNMCz was obtained 0.49 g in 50% yield. 1H NMR (500 MHz, CD2Cl2) δ 8.42–8.12 (m, 6H), 7.70 (dddd, *J* = 26.4, 24.6, 19.1, 7.0 Hz, 13H), 7.53–7.17 (m, 15H), 7.04 (s, 1H), 2.12 (d, *J* = 16.1 Hz, 4H), 1.64–1.19 (m, 25H), 0.89 (ddd, *J* = 21.4, 15.3, 7.3 Hz, 5H). 13C NMR (101 MHz, CD2Cl2) δ 152.79 (s), 126.18 (s), 125.70 (s), 121.42 (s), 120.99 (s), 120.51 (d, *J* = 43.6 Hz), 119.88 (s), 118.87 (s), 110.16 (d, *J* = 13.2 Hz), 107.91 (s), 53.99 (s), 53.72 (s), 53.44 (s), 53.17 (s), 52.90 (s), 35.07 (s), 31.18 (s), -0.41 (s). MALDI-TOF-MS (*m/z*): calcd for C72H68N4, 988.544; found, [M+] 989.5519.

# Photophysical properties of hot-exciton materials


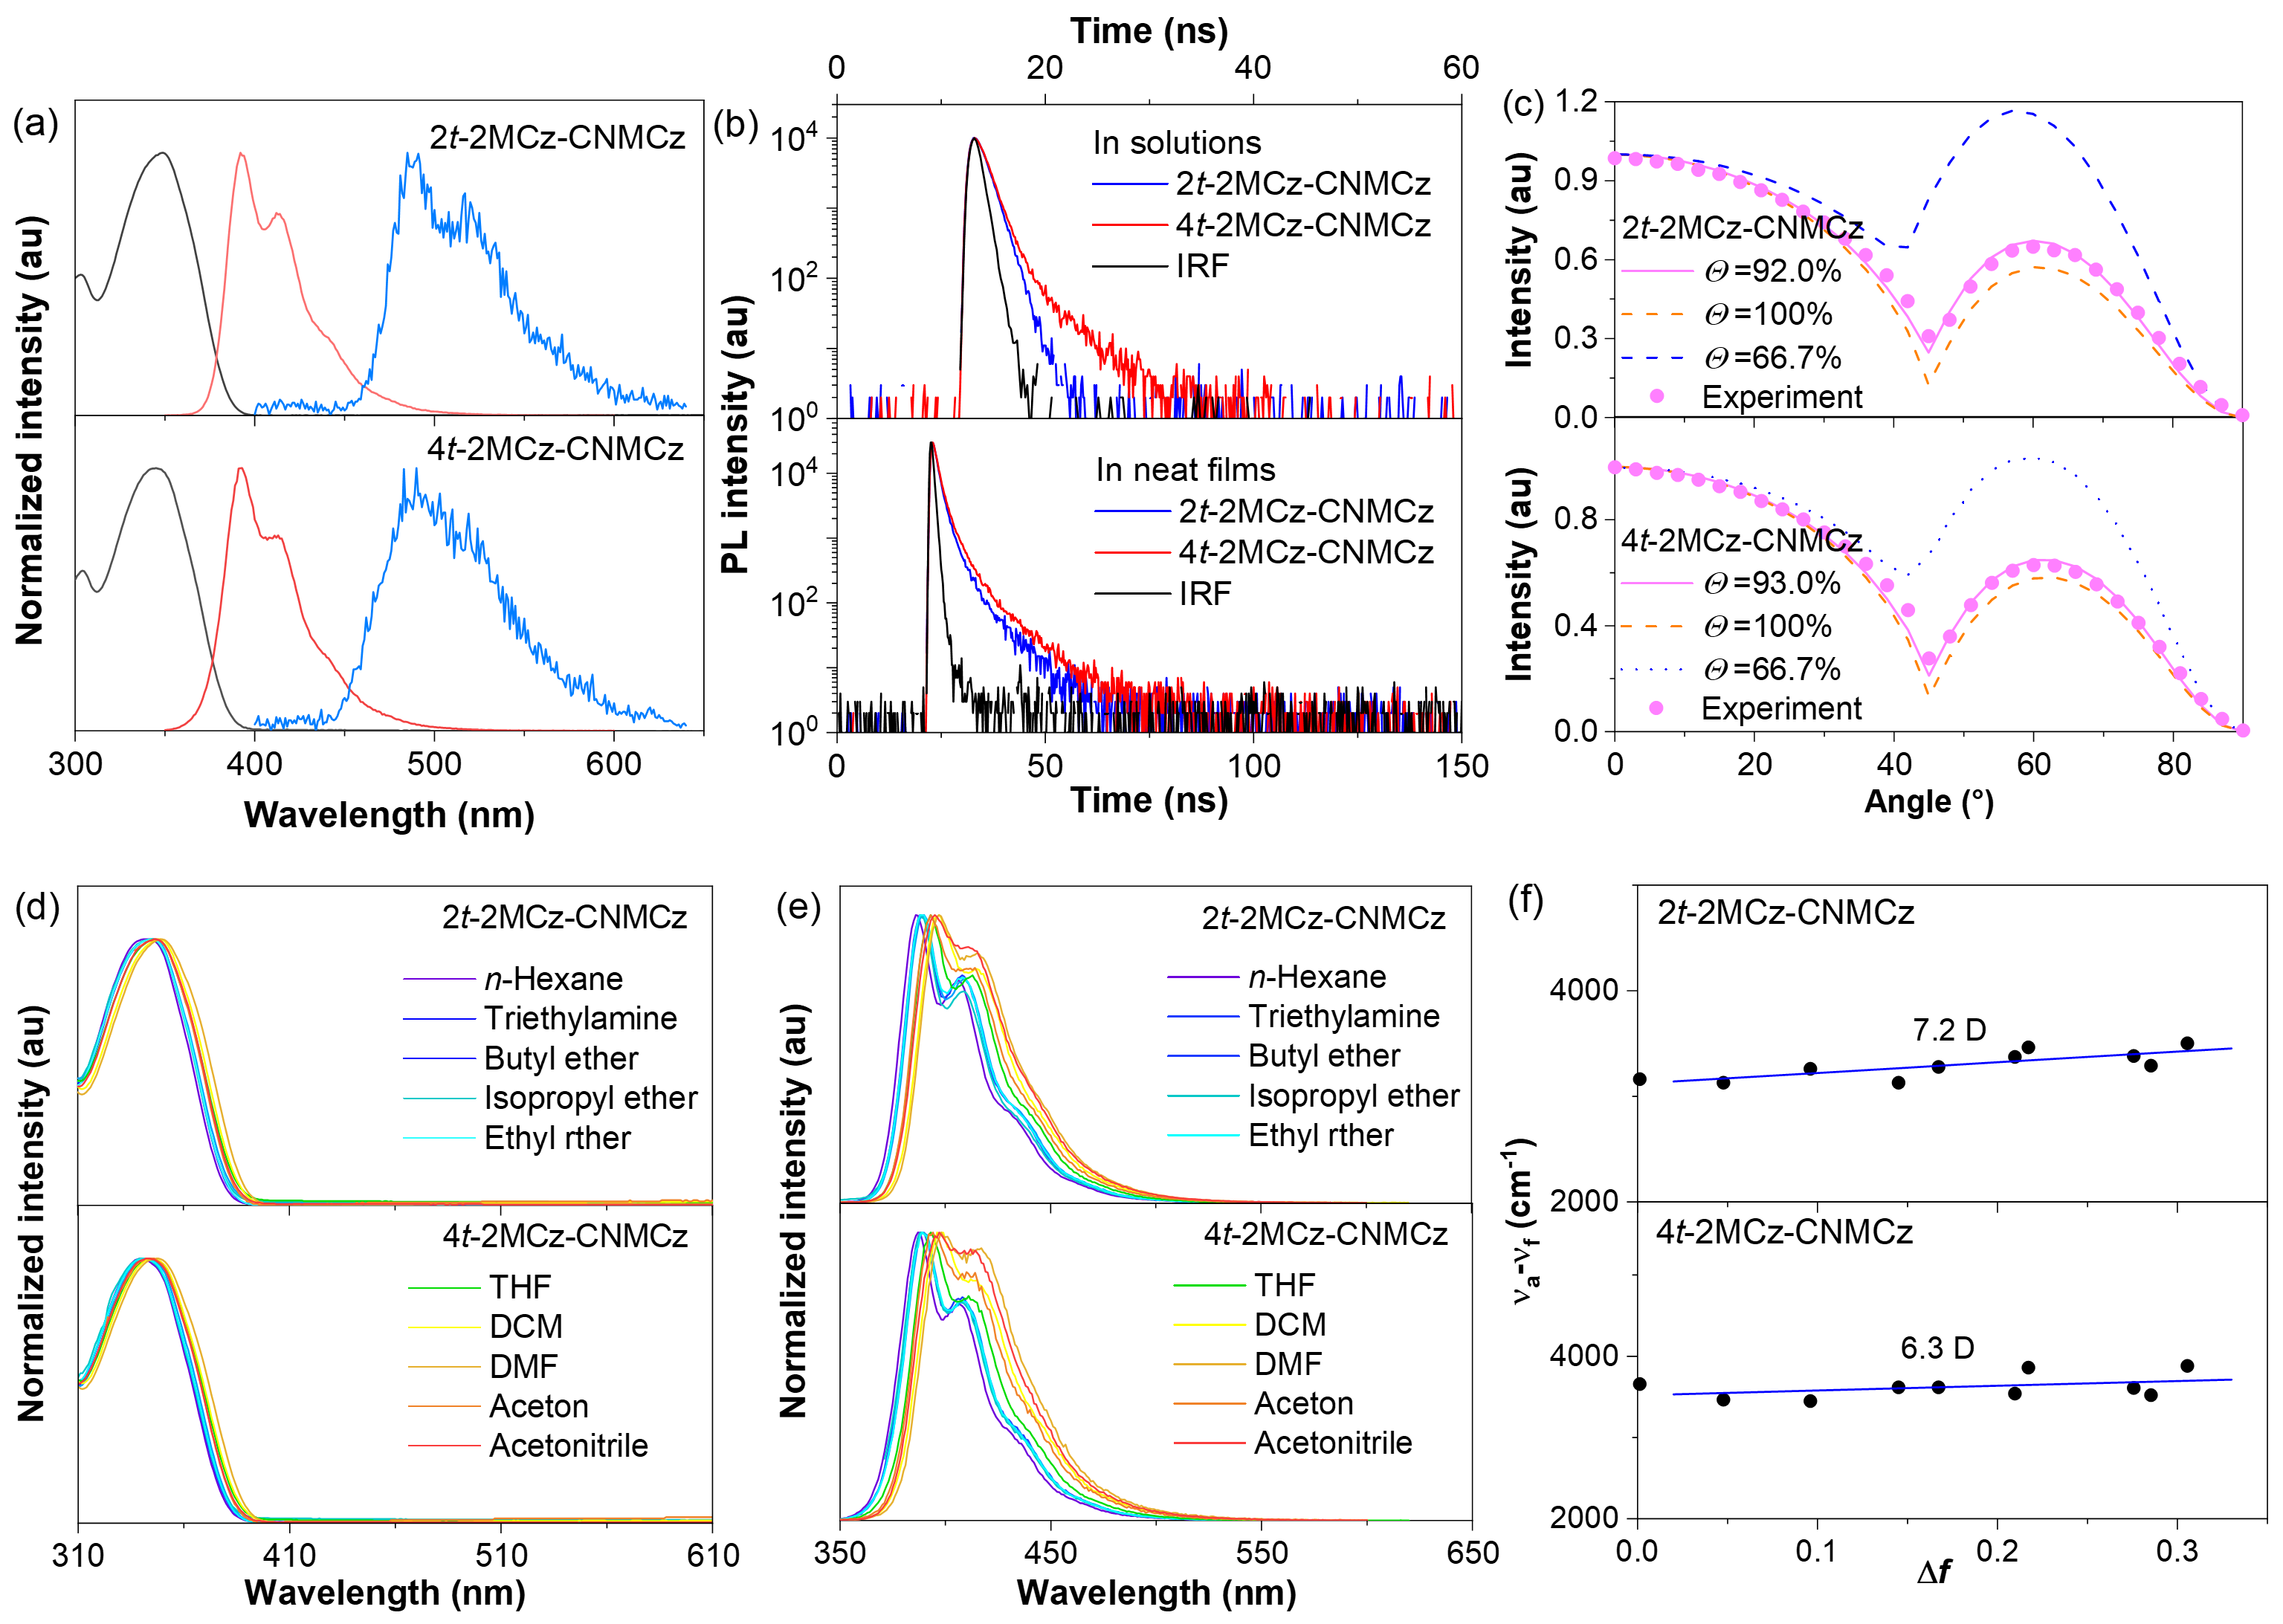


**Figure S1.** (a) UV-vis absorption (black), fluorescence spectra in 300 K (red), and phosphorescence spectra (blue) of 2*t*-2MCz-CNMCz and 4*t*-2MCz-CNMCz. (b) Transient PL decay curves in toluene solutions (top) and neat films (bottom). (c) *p-*Polarized angle-dependent PL radiance in neat films. (d) UV-vis absorptions in different solvents with various polarities. (e) UV-vis absorptions of 2*t*-2MCz-CNMCz and 4*t*-2MCz-CNMCz in different solvents with various polarities. (f) Solvatochromic *Lippert–Mataga* models of 2*t*-2MCz-CNMCz and 4*t*-2MCz-CNMCz.

**Table S1.** Optical, thermal, and electronic properties of 2*t*-2MCz-CNMCz and 4*t*-2MCz-CNMCz.

| Compound | *λ*abs a(nm) | *λ*em (nm) | |  | *Φ*PLc (%) | |  | *τ*d(ns) | | *E*S1/*E*T1/Δ*E*S1T1e  (eV) | | HOMO/LUMOf (eV) |
| --- | --- | --- | --- | --- | --- | --- | --- | --- | --- | --- | --- | --- |
| solna | filmb | solna | filmb | solna | filmb |
| 2*t*-2MCz-CNMCz | 349 | 392 | 406 |  | 85.3 | 60.3 |  | 1.1 | 1.2 | 3.29/2.68/0.61 | 2.24/5.53 | |
| 4*t*-2MCz-CNMCz | 345 | 393 | 425 |  | 93.2 | 55.6 |  | 1.2 | 2.2 | 3.32/2.77/0.55 | 2.24/5.54 | |

aIn toluene solution (10─5 M) at room temperature.

bIn neat film. cAbsolute PLQY evaluated using a calibrated integrating sphere.

dFluorescence lifetime. eEstimated from the onsets of the fluorescence and phosphorescence spectra in toluene at 77 K. fHOMO and LUMO were measured from the oxidation potential by cyclic voltammetry with ferrocene as the external standard.

**Table S2.** Absorption and emission peak positions of 2*t*-2MCz-CNMCz in different solvents.

| Solvents | *ε*a | *n* | *f* (*ε*,*n*)b | *λ*a (nm) | *λ*f (nm) | *ν*a-*ν*f (cm−1)c |
| --- | --- | --- | --- | --- | --- | --- |
| *n*-Hexane | 1.90 | 1.375 | 0.001 | 344 | 386 | 3163 |
| Triethylamine | 2.42 | 1.401 | 0.048 | 346 | 388 | 3129 |
| Butyl ether | 3.08 | 1.399 | 0.096 | 346 | 390 | 3261 |
| Isopropyl ether | 3.88 | 1.368 | 0.145 | 346 | 388 | 3129 |
| Ethyl ether | 4.34 | 1.352 | 0.167 | 345 | 389 | 3279 |
| Tetrahydrofuran | 7.58 | 1.407 | 0.210 | 347 | 393 | 3373 |
| Dichloromethane | 8.93 | 1.424 | 0.217 | 349 | 397 | 3464 |
| Dimethyl formamide | 37.00 | 1.427 | 0.276 | 350 | 397 | 3383 |
| Acetone | 20.70 | 1.359 | 0.284 | 348 | 393 | 3290 |
| Acetonitrile | 37.50 | 1.344 | 0.305 | 347 | 395 | 3502 |

aThe solvent dielectric constant and *n* is the solvent refractive index. bThe orientational polarizability of solvents. cThe Stokes shift.

**Table S3.** Absorption and emission peak positions of 4*t*-2MCz-CNMCz in different solvents.

| Solvents | *ε*a | *n* | *f* (*ε*,*n*)b | *λ*a (nm) | *λ*f (nm) | *ν*a-*ν*f (cm−1)c |
| --- | --- | --- | --- | --- | --- | --- |
| *n*-Hexane | 1.90 | 1.375 | 0.001 | 339 | 387 | 3659 |
| Triethylamine | 2.42 | 1.401 | 0.048 | 342 | 388 | 3467 |
| Butyl ether | 3.08 | 1.399 | 0.096 | 343 | 389 | 3448 |
| Isopropyl ether | 3.88 | 1.368 | 0.145 | 341 | 389 | 3619 |
| Ethyl ether | 4.34 | 1.352 | 0.167 | 341 | 389 | 3619 |
| Tetrahydrofuran | 7.58 | 1.407 | 0.210 | 345 | 393 | 3540 |
| Dichloromethane | 8.93 | 1.424 | 0.217 | 345 | 398 | 3860 |
| Dimethyl formamide | 37.00 | 1.427 | 0.276 | 348 | 398 | 3610 |
| Acetone | 20.70 | 1.359 | 0.284 | 346 | 394 | 3521 |
| Acetonitrile | 37.50 | 1.344 | 0.305 | 344 | 397 | 3881 |

aThe solvent dielectric constant and *n* is the solvent refractive index. bThe orientational polarizability of solvents. cThe Stokes shift.

# Computational results


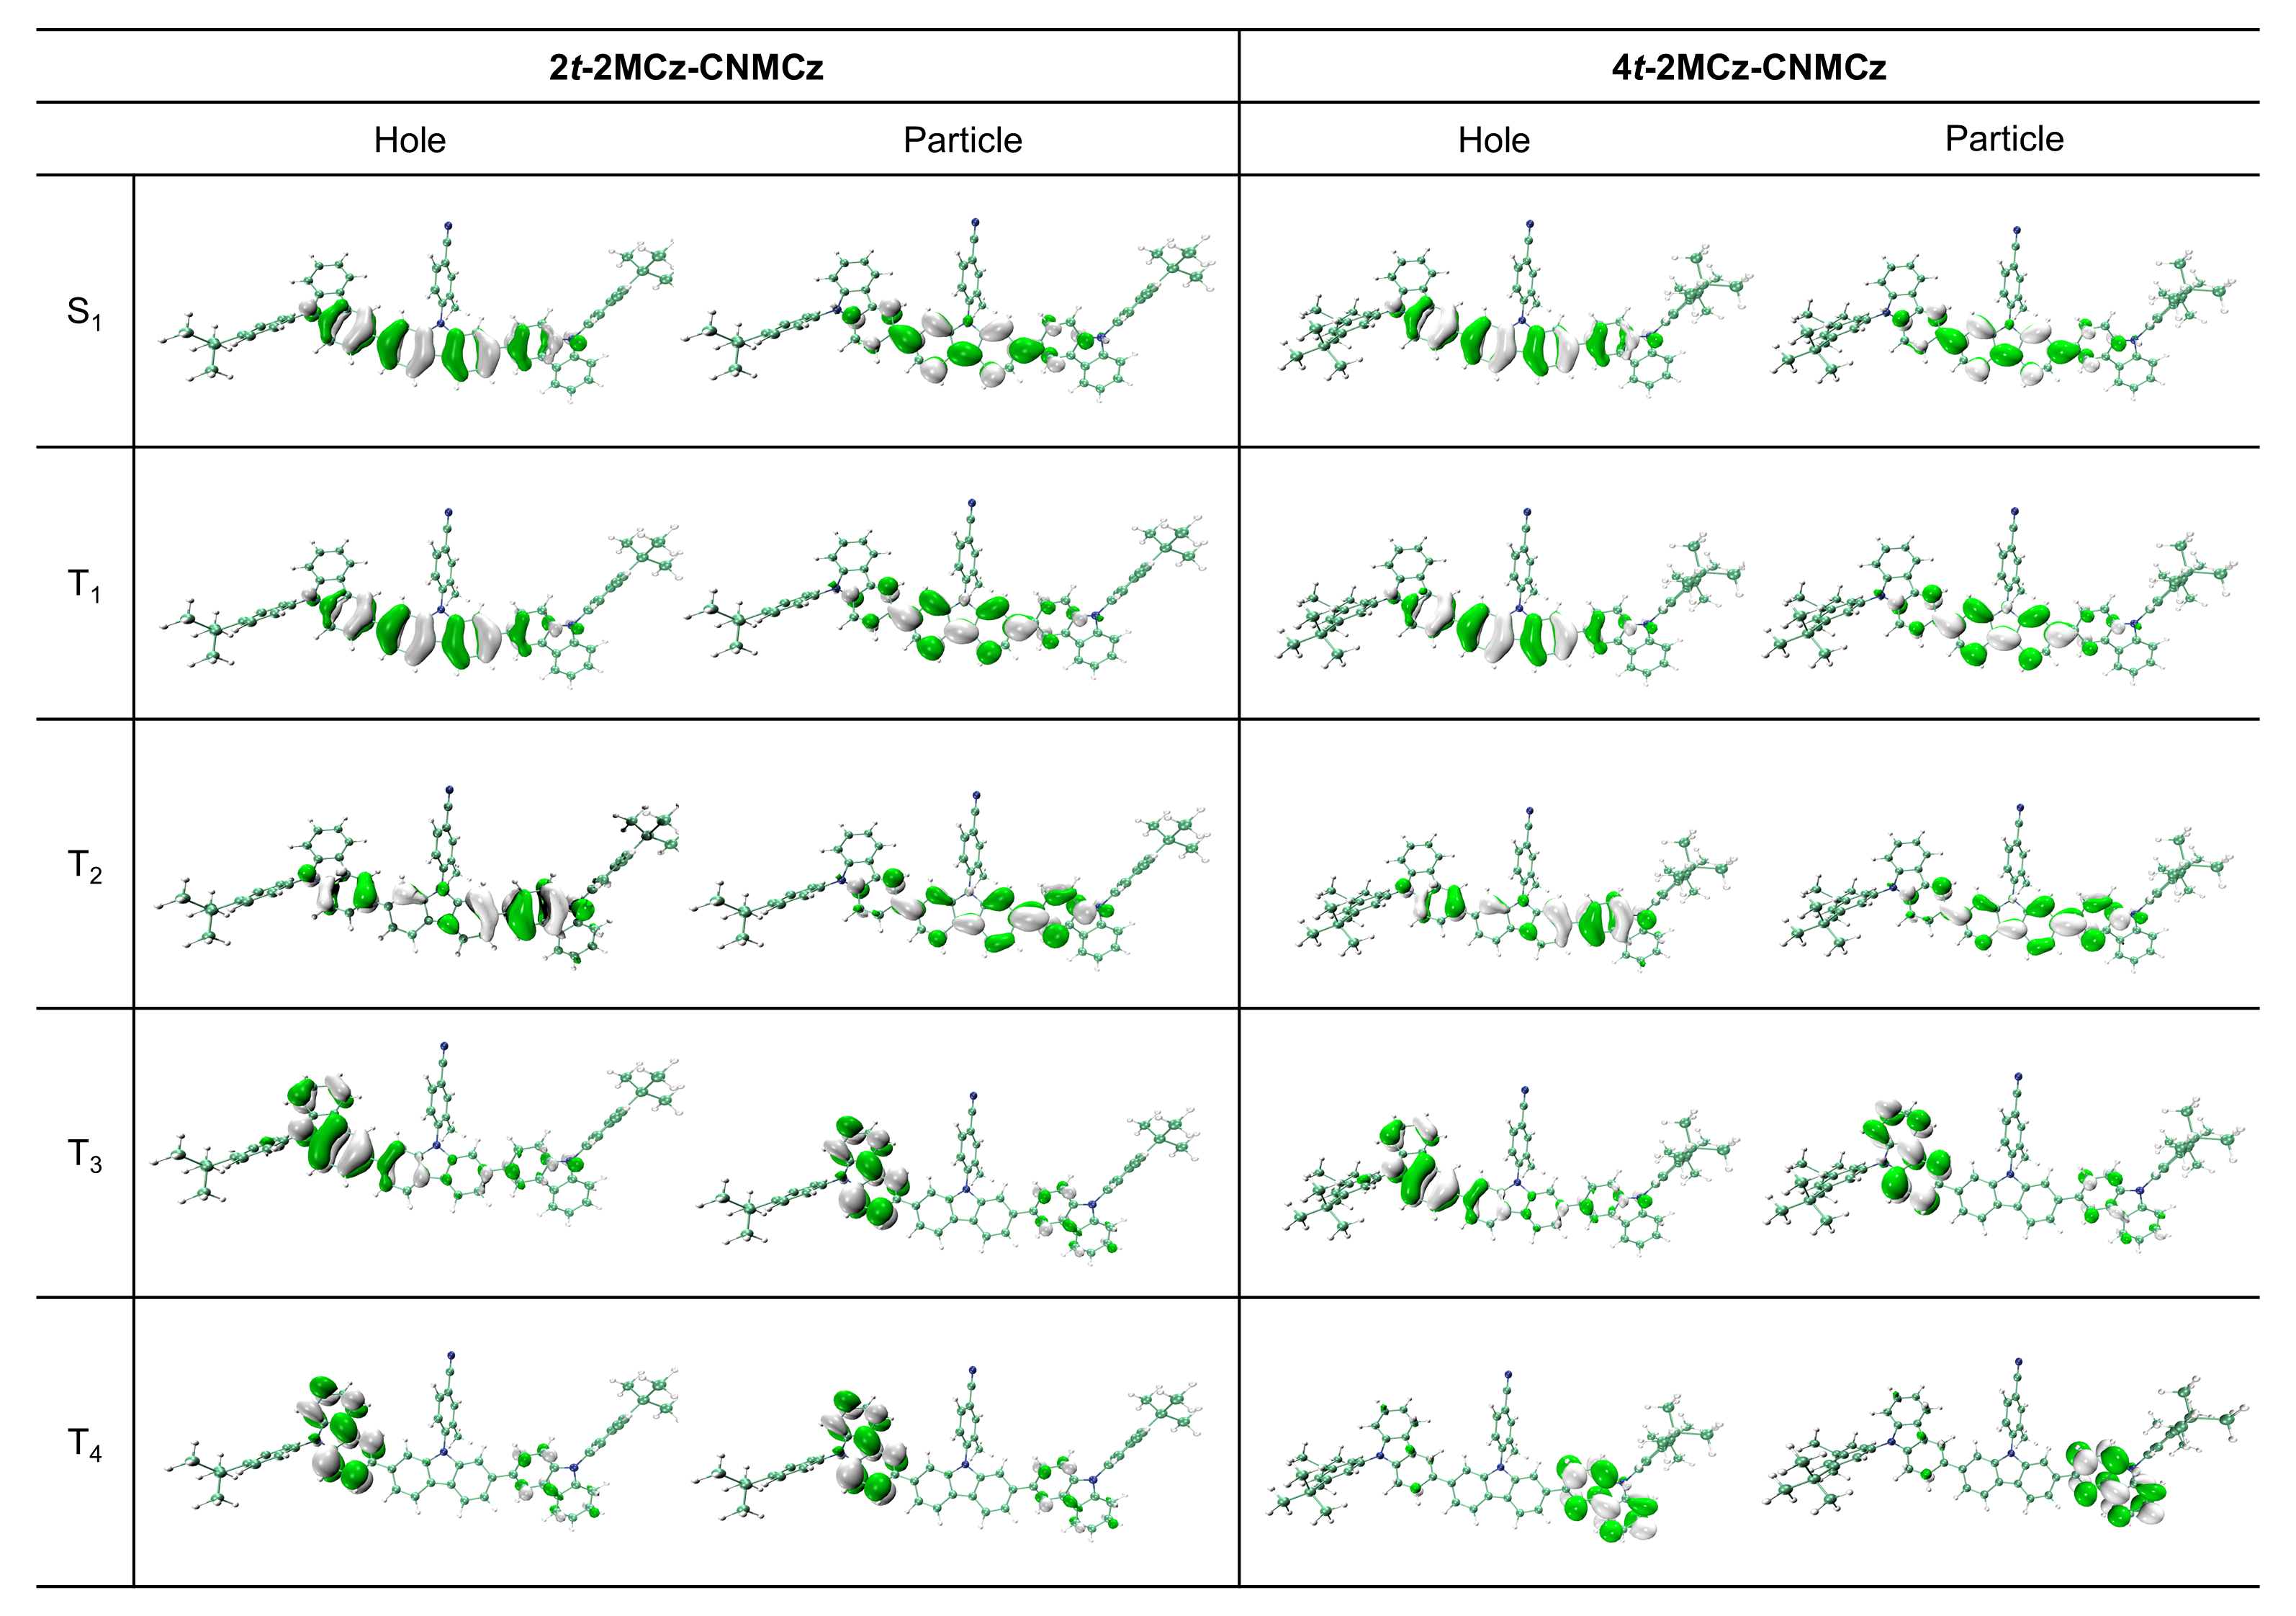


**Figure S2.** The frontier orbital distributions and NTOs distribution of 2*t*-2MCz-CNMCz and 4*t*-2MCz-CNMCz.

**Table S4.** Energy levels and SOC of singlet and triplet states of 2*t*-2MCz-CNMCz.

| n= | 1 | 2 | 3 | 4 | 5 |
| --- | --- | --- | --- | --- | --- |
| Sn /eV | 3.226 | 3.874 | 3.887 | 3.964 | 3.997 |
| Tn /eV | 2.461 | 3.174 | 3.416 | 3.428 | 3.459 |
| (〈S1ĤSOTn〉) /c*m*─1 | 0.033 | 0.224 | 0.072 | 0.173 | 0.117 |

**Table S5.** Energy levels and SOC of singlet and triplet states of 4*t*-2MCz-CNMCz.

| n= | 1 | 2 | 3 | 4 | 5 |
| --- | --- | --- | --- | --- | --- |
| Sn /eV | 3.223 | 3.870 | 3.886 | 3.960 | 3.994 |
| Tn /eV | 2.461 | 3.170 | 3.413 | 3.425 | 3.459 |
| (〈S1ĤSOTn〉) /c*m*─1 | 0.033 | 0.206 | 0.081 | 0.191 | 0.117 |

**
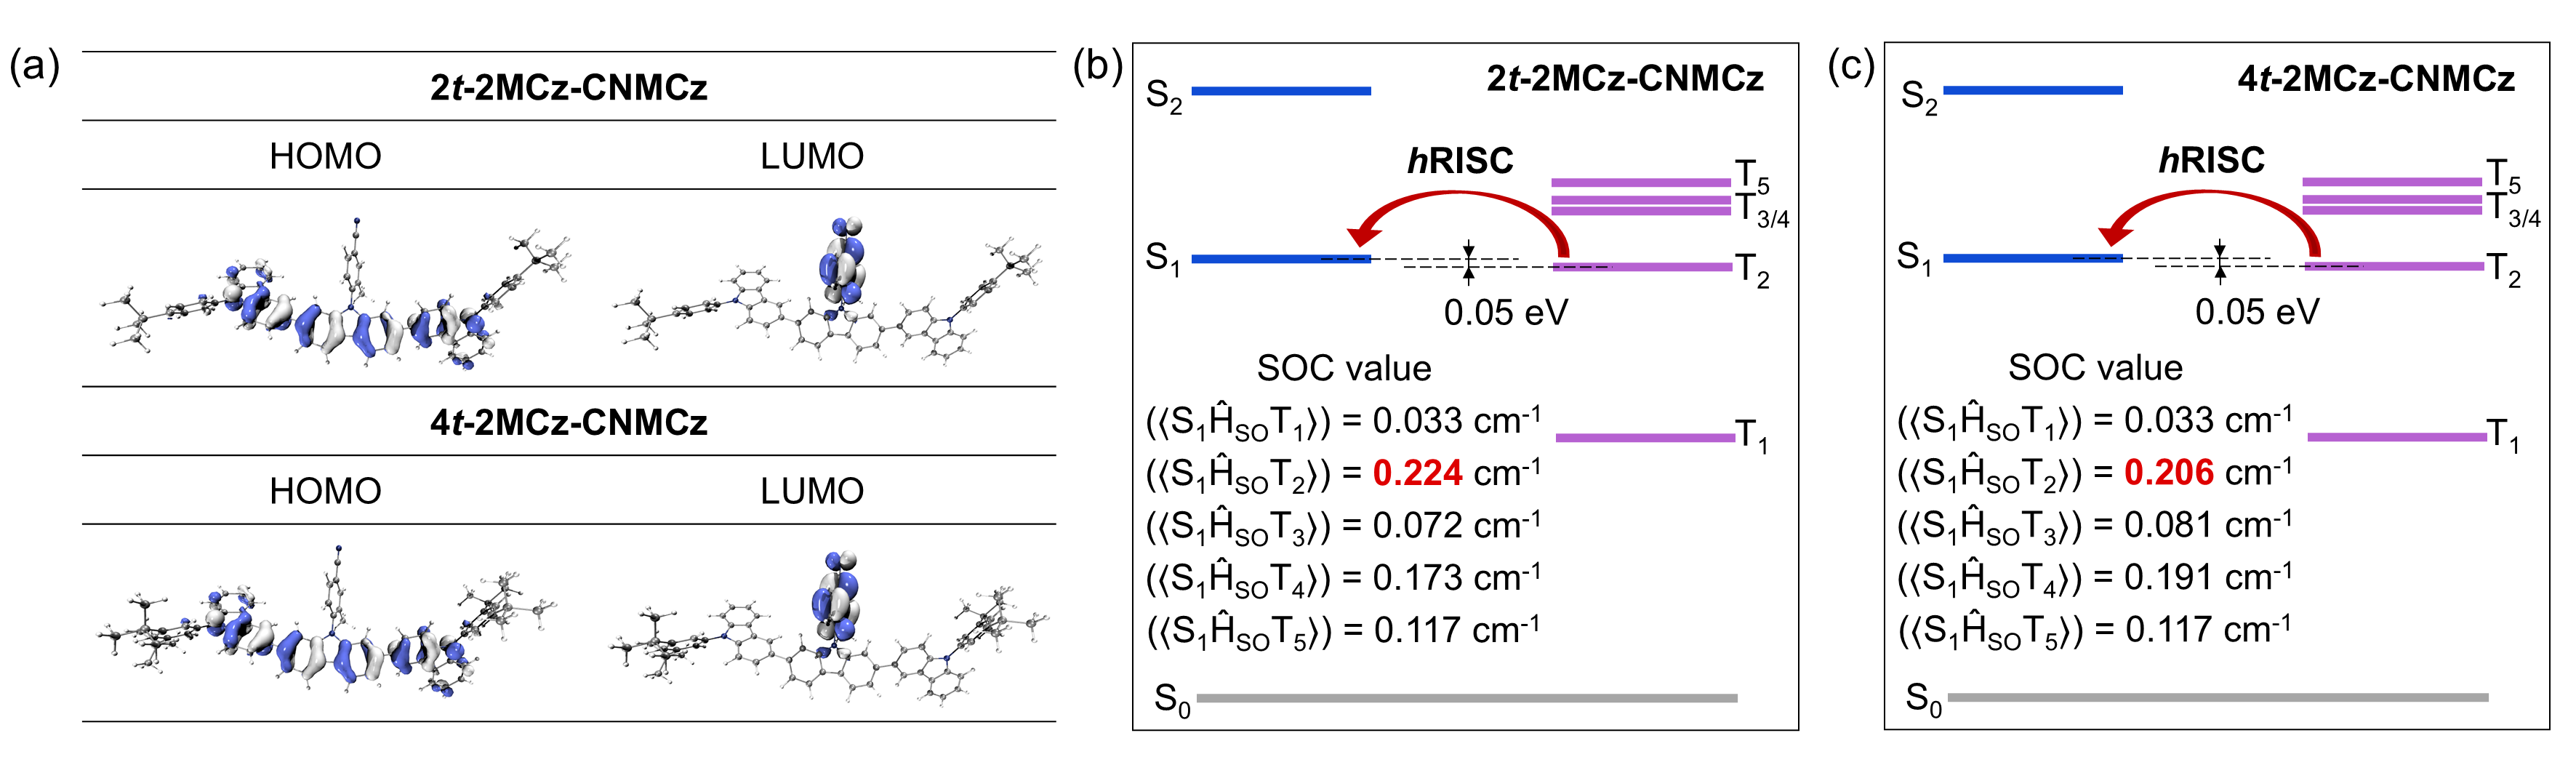
**

**Figure S3.** The HOMO, LUMO distribution, and proposed hot-exciton mechanisms of 2*t*-2MCz-CNMCz and 4*t*-2MCz-CNMCz. The S1 energy level of 2*t*-2MCz-CNMCz and 4*t*-2MCz-CNMCz was calculated to be 3.23 eV to 3.22 eV, and the T1 energy levels are also calculated to be 2.46 eV and 2.46 eV. It can be noted that the energy gaps (Δ*E*ST) between the high-lying triplet states (T2, T3, and T4) and S1 states are relatively small for both 2*t*-2MCz-CNMCz and 4*t*-2MCz-CNMCz. This kind of energy-level distribution could facilitate the triplet-to-singlet conversion through the hot-exciton channels. According Figure S2, the NTO distribution of T2 level exhibits the hybrid local and charge-transfer feature. In addition, for both 2*t*-2MCz-CNMCz and 4*t*-2MCz-CNMCz, the spin-orbital coupling (SOC) values between S1 and T2 (〈S1ĤSOT2〉) are remarkably larger than 〈S1ĤSOT3〉 and 〈S1ĤSOT4〉, which implies that T2→S1 might bedominant in the hot-exciton channels (Table S4 and S5).

# Electrochemical and thermal stability measurements


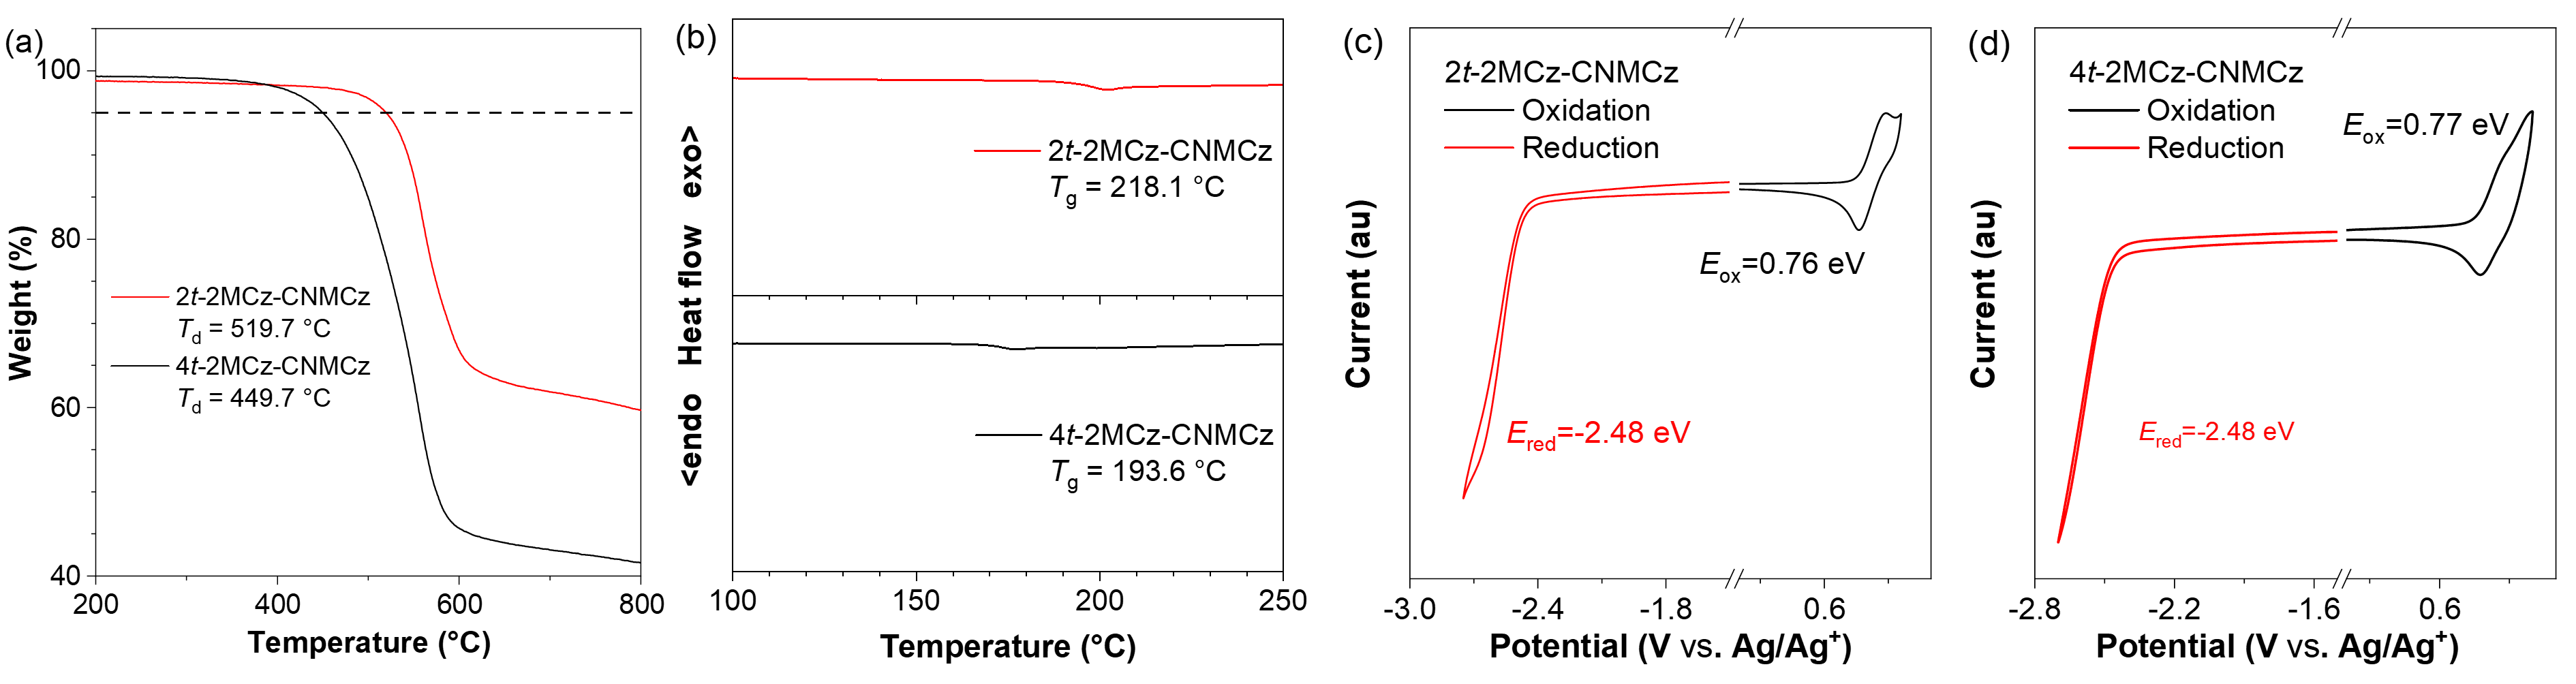


**Figure S4.** (a) Thermogravimetric analysis curves. (b) Differential scanning calorimetry curves. Cyclic voltammograms of (c) 2*t*-2MCz-CNMCz and (d) 4*t*-2MCz-CNMCz, measured in DCM/DMF containing 0.1 m tetra-*n*-butylammonium hexafluorophosphate.

# Photophysical properties of exciplexes

**
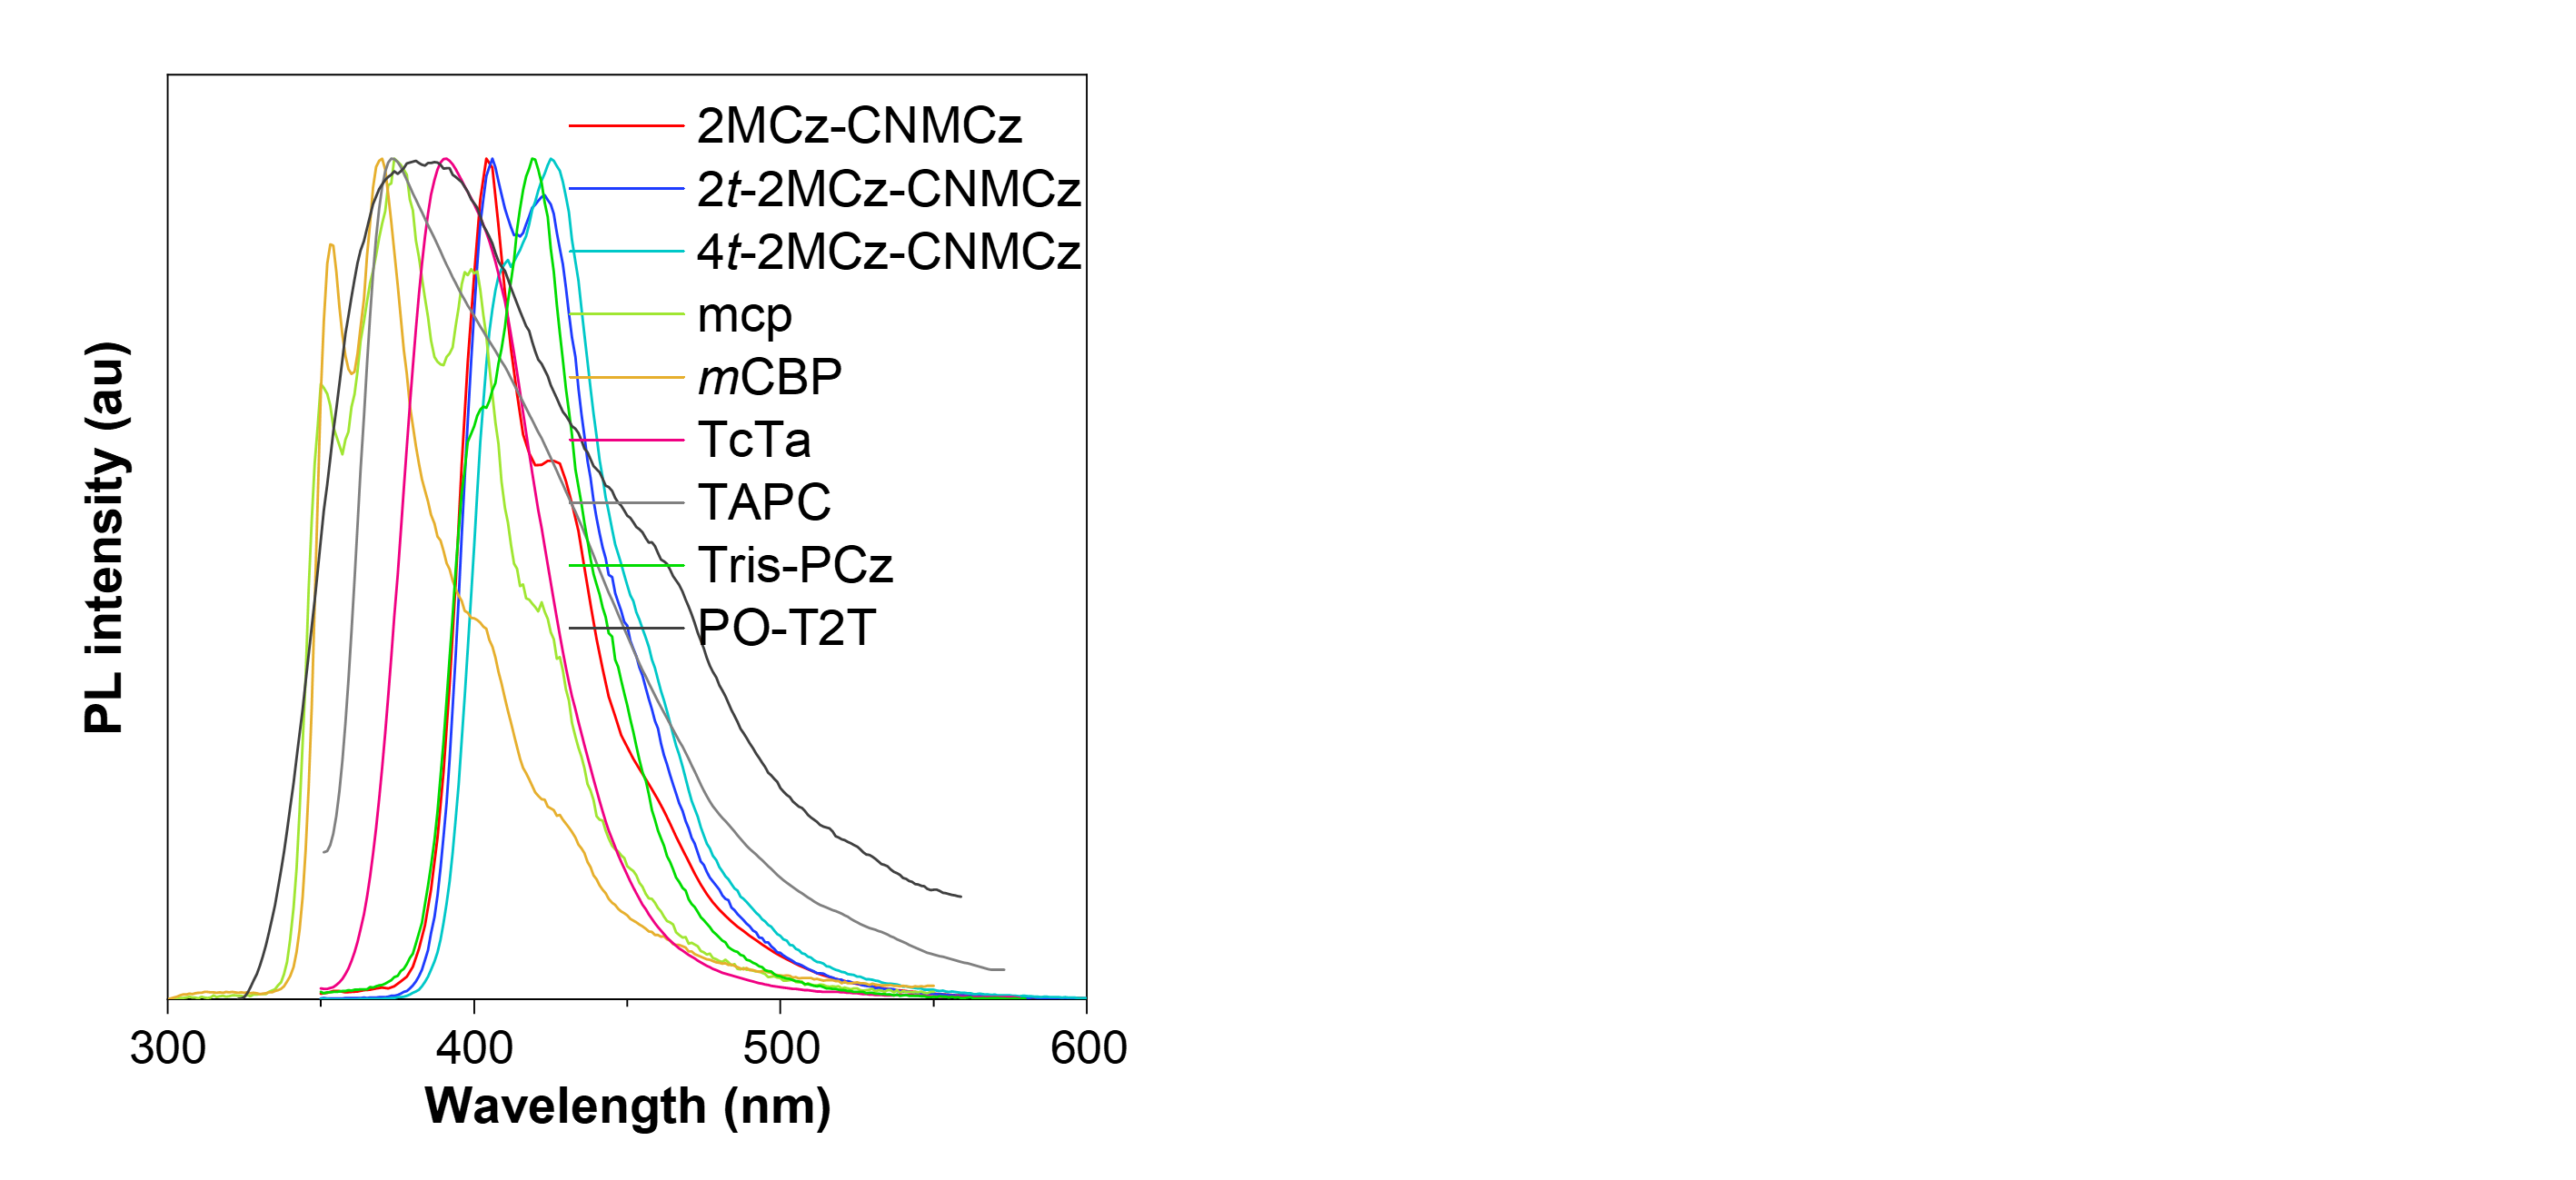
**

**Figure S5.** PL spectra of donor and acceptor.

**
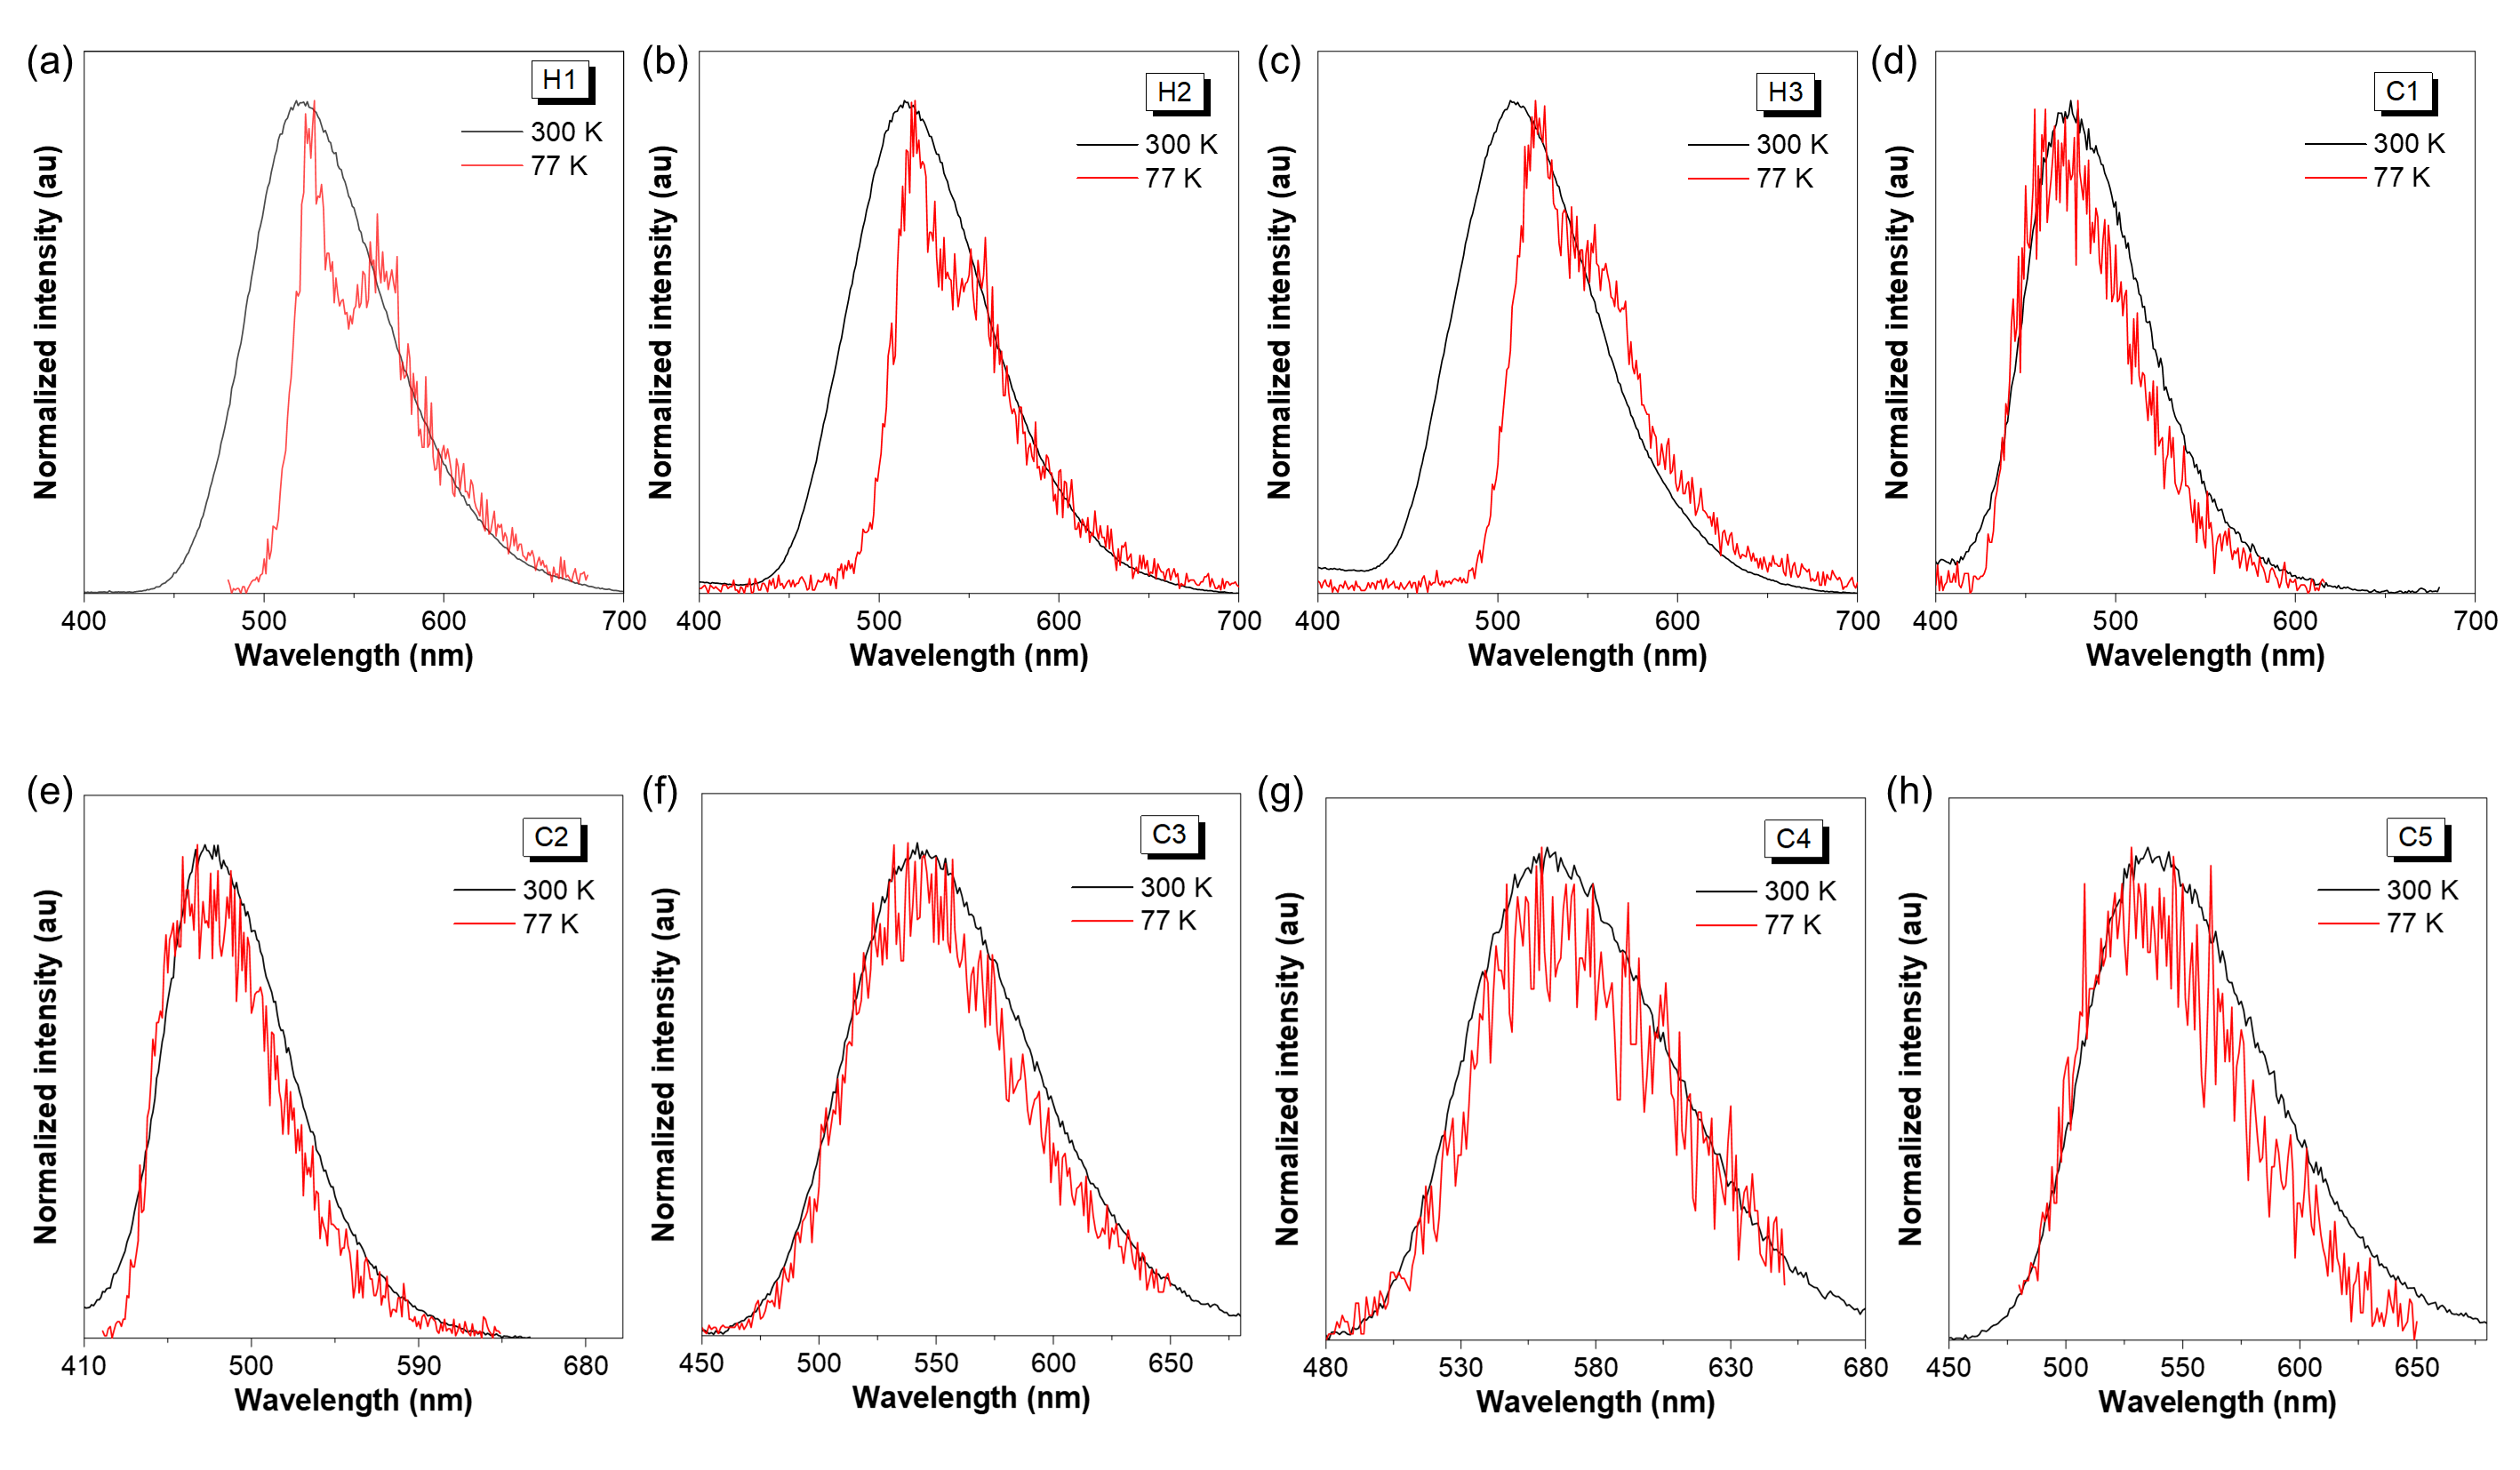
**

**Figure S6.** Fluorescence spectra (black line) at 300 K and phosphorescence spectra (red line) at 77 K of different exciplex films.


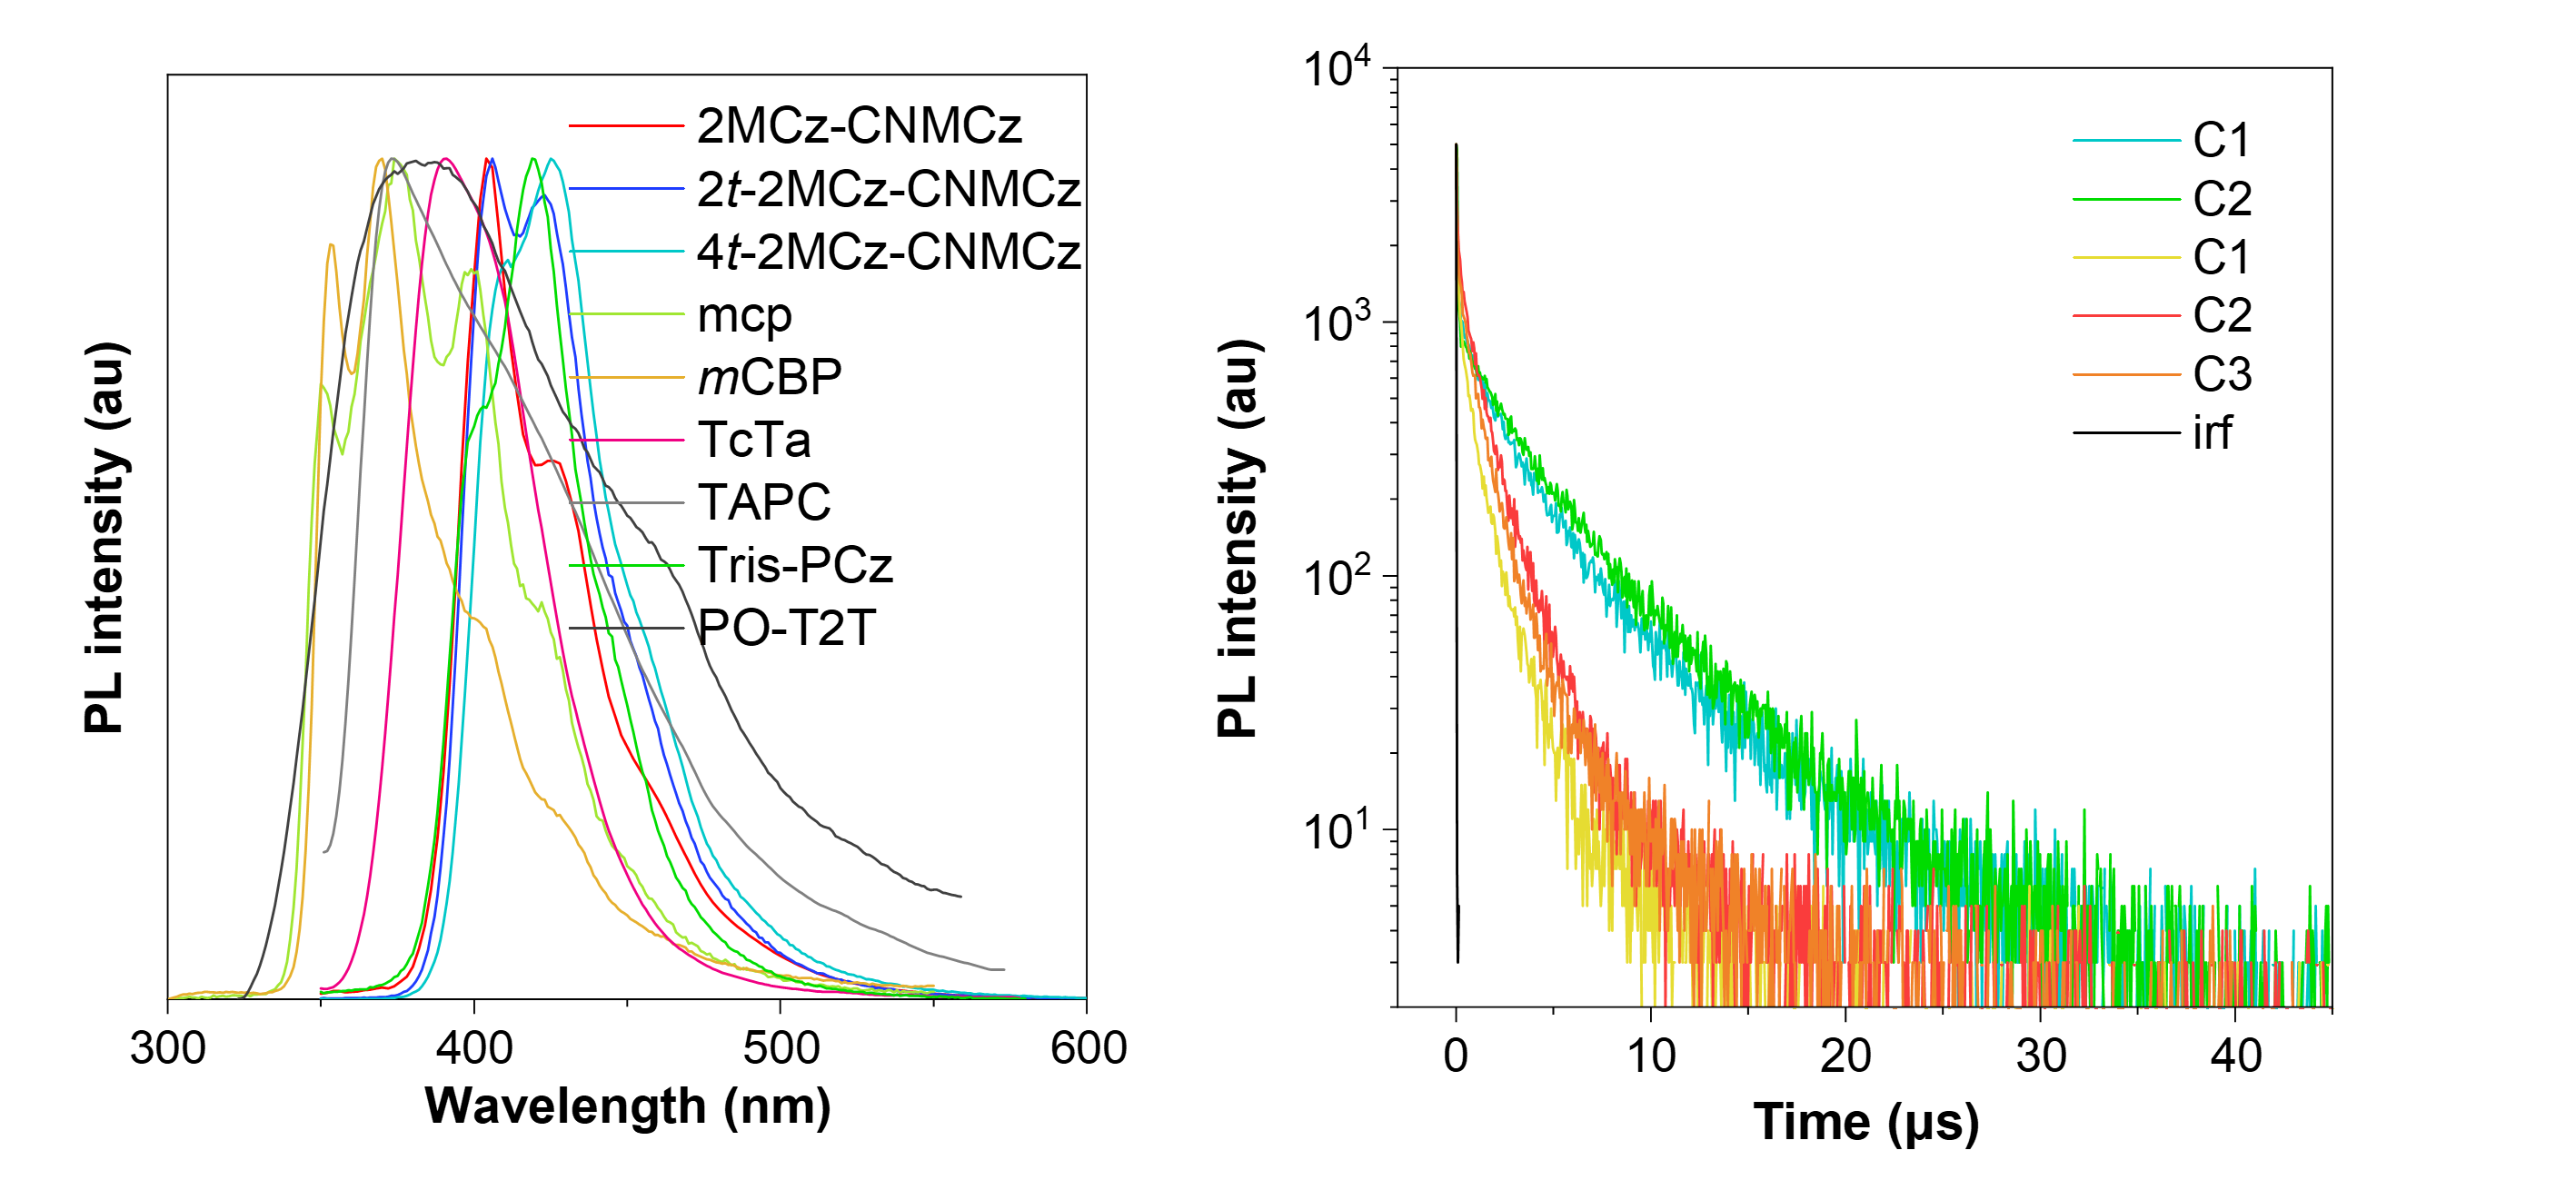


**Figure S7.** The transient PL decay curves of C-type exciplexes.

**
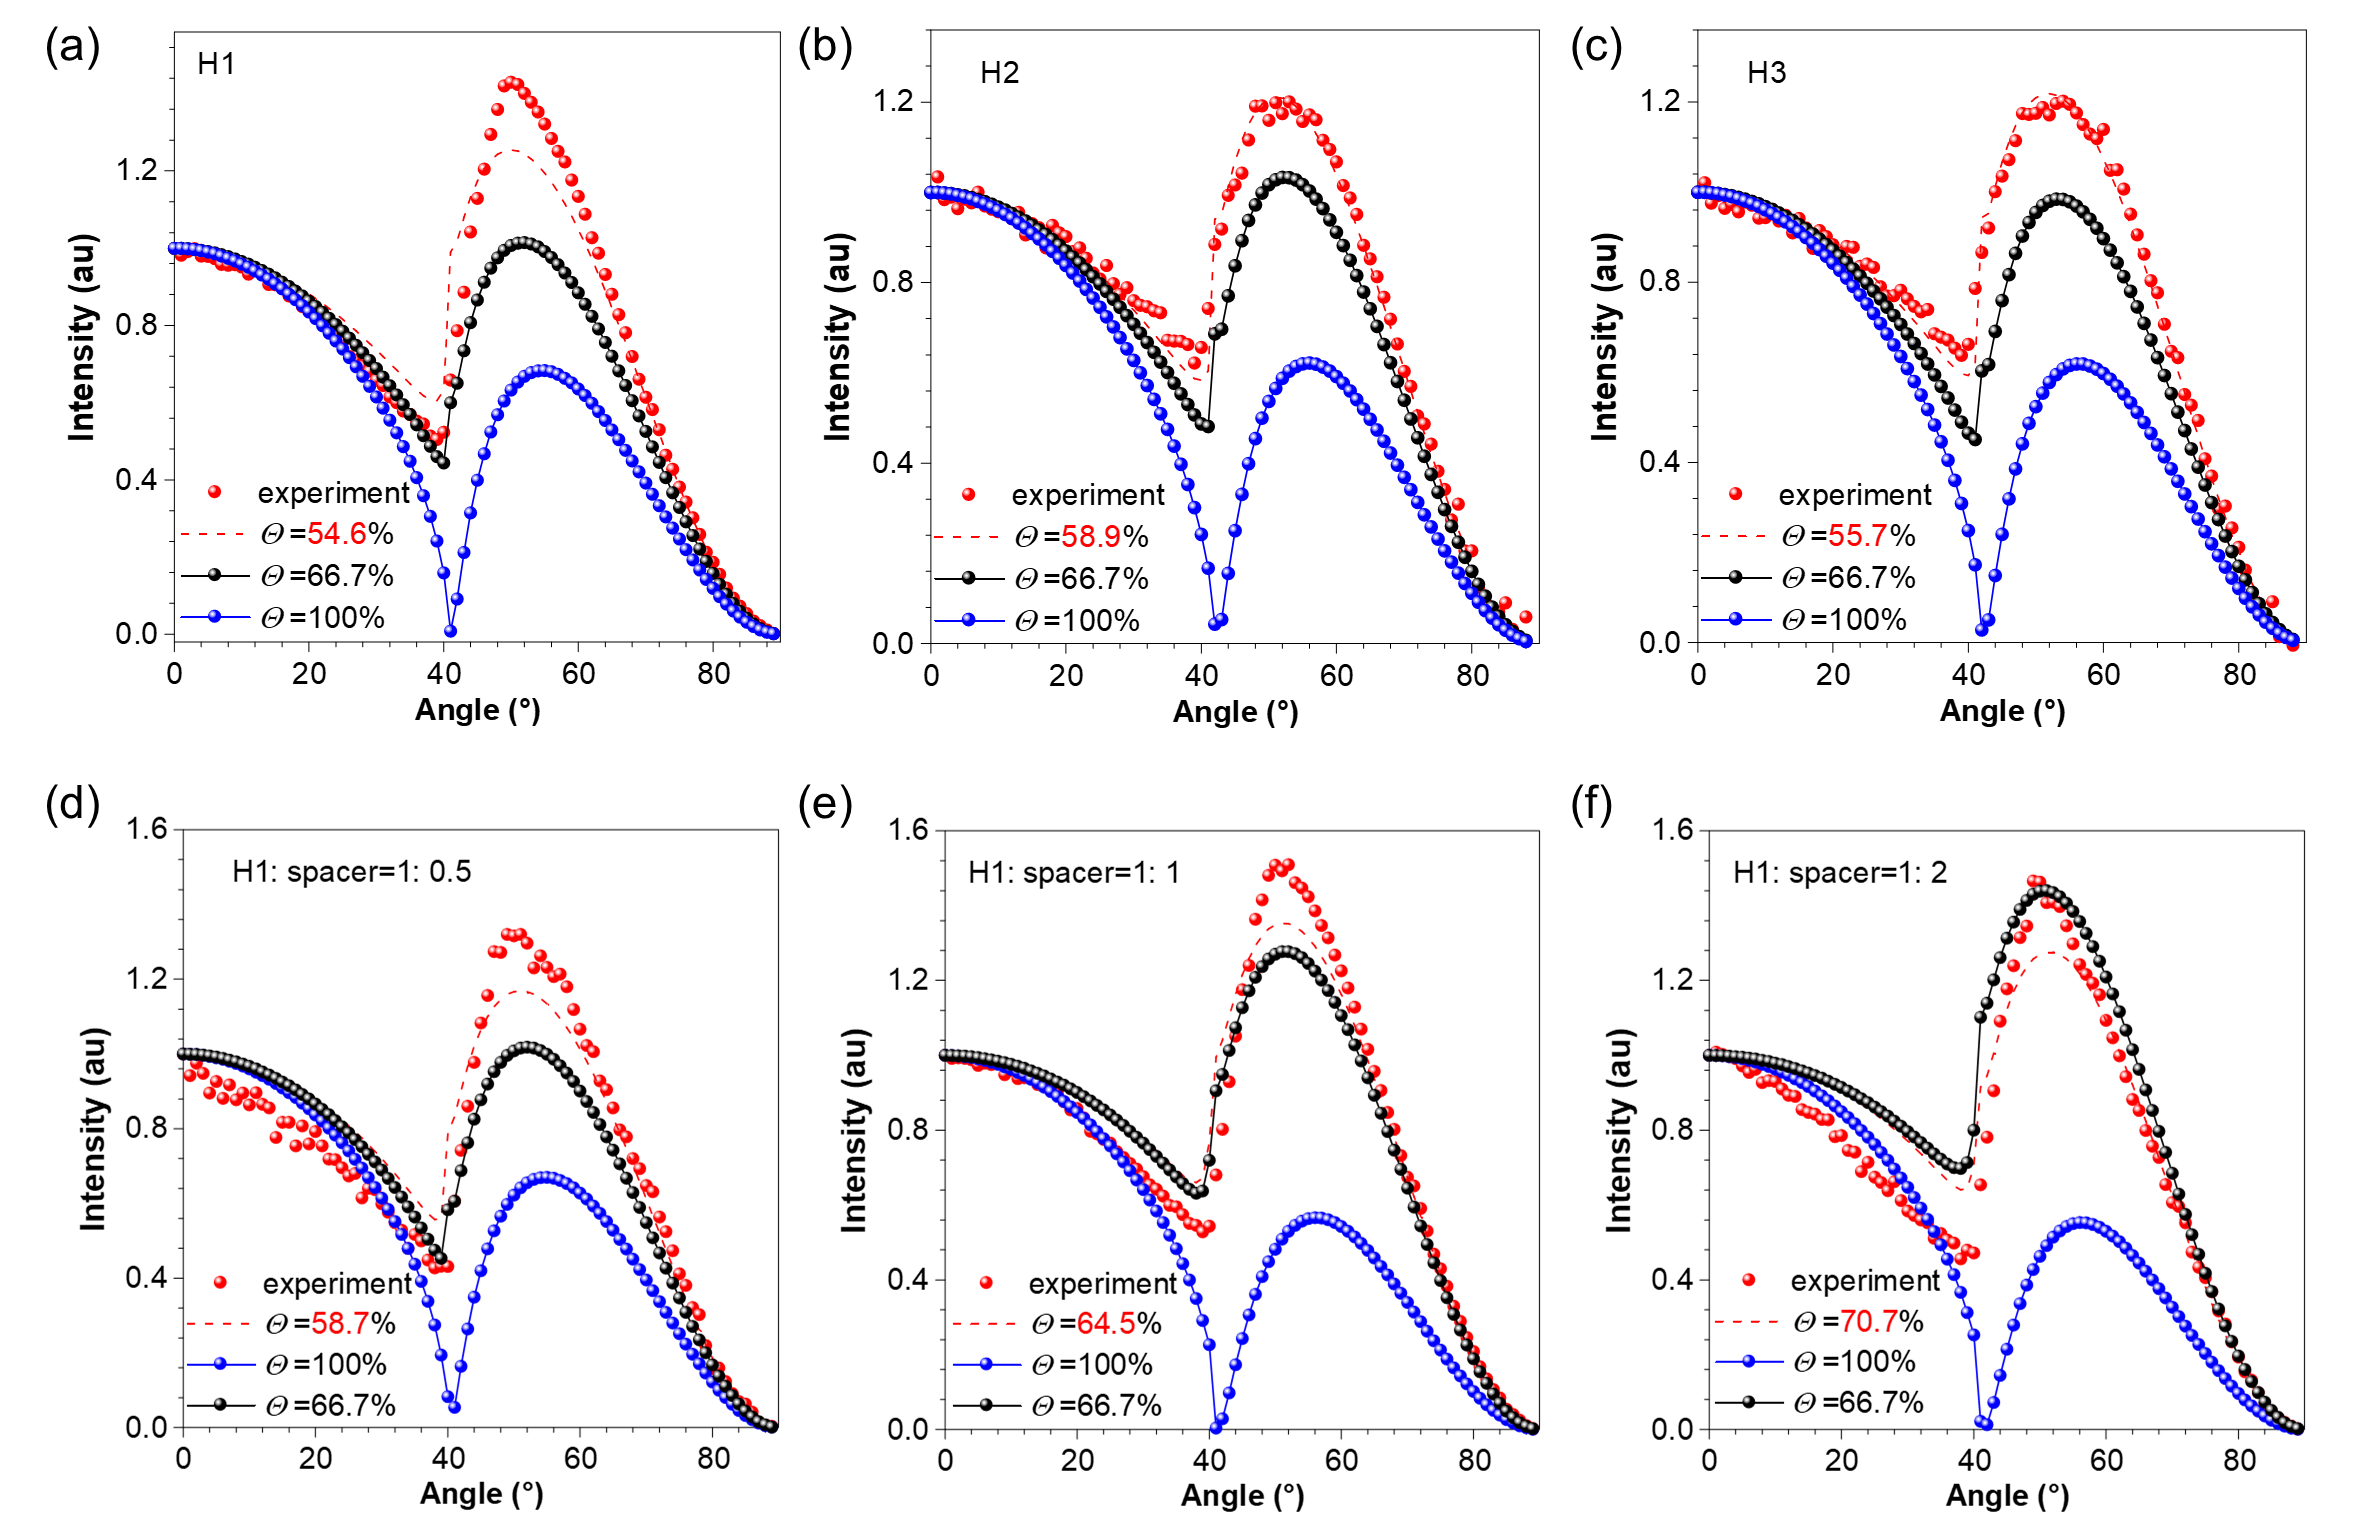
**

**Figure S8.** Variable-angle PL measurement of films of three HE-type exciplexes and the exciplexes doping DPEPO of different ratios. *Θ* was orientation factor. For fully horizontal dipoles, *Θ* equals 100% and isotropic dipole orientation, *Θ* equals 67%. The refractive indices of the functional materials and the emitters were measured on J. A. Woolam V-VASE spectroscopic ellipsometer with a wavelength range of 300-1000 nm. The step size was 10 nm, and the incident angle was 75°. The material neat films were prepared by evaporating on crystalline silicon and the thickness of each material films were 30 nm. In this work, the refractive indices of HATCN, TAPC, TcTa, exciplex, PO-T2T at were measured as 1.57±0.1, 1.75±0.1, 1.53±0.1, 1.79±0.1 (H1), 1.74±0.1 (H1: DPEPO=1: 0.5), 1.72±0.1 (H1: DPEPO=1: 1), and 1.69±0.1 (H1: DPEPO=1: 2) green emission. The OLED model was constructed by Ansys Lumerical FDTD, and the vertical optical outcoupling efficiencies (*η*⊥) were evaluated to 0.55%, 0.55%, 0.57%, and 0.56%, and the horizontal optical outcoupling efficiencies (*η*∥) were evaluated to 46.8%, 46.8%, 47.4%, and 48.2%. Based on the horizontal transition dipole ratios (*Θ*//), the optical outcoupling efficiencies (*η*out) were calculated to be 25.8%, 27.7%, 30.8%, and 34.3%, respectively.

**Table S6**. Optical coupling output efficiencies of OLEDs with doping H1 into DPEPO host.

| Device | percentage by weight of H1 and spacer | optical coupling output efficiency [%] |
| --- | --- | --- |
| D0 | 1: 0.5 | 27.7 |
| D1 | 1: 1 | 30.8 |
| D2 | 1: 2 | 34.3 |

# Exciton and carrier dynamics


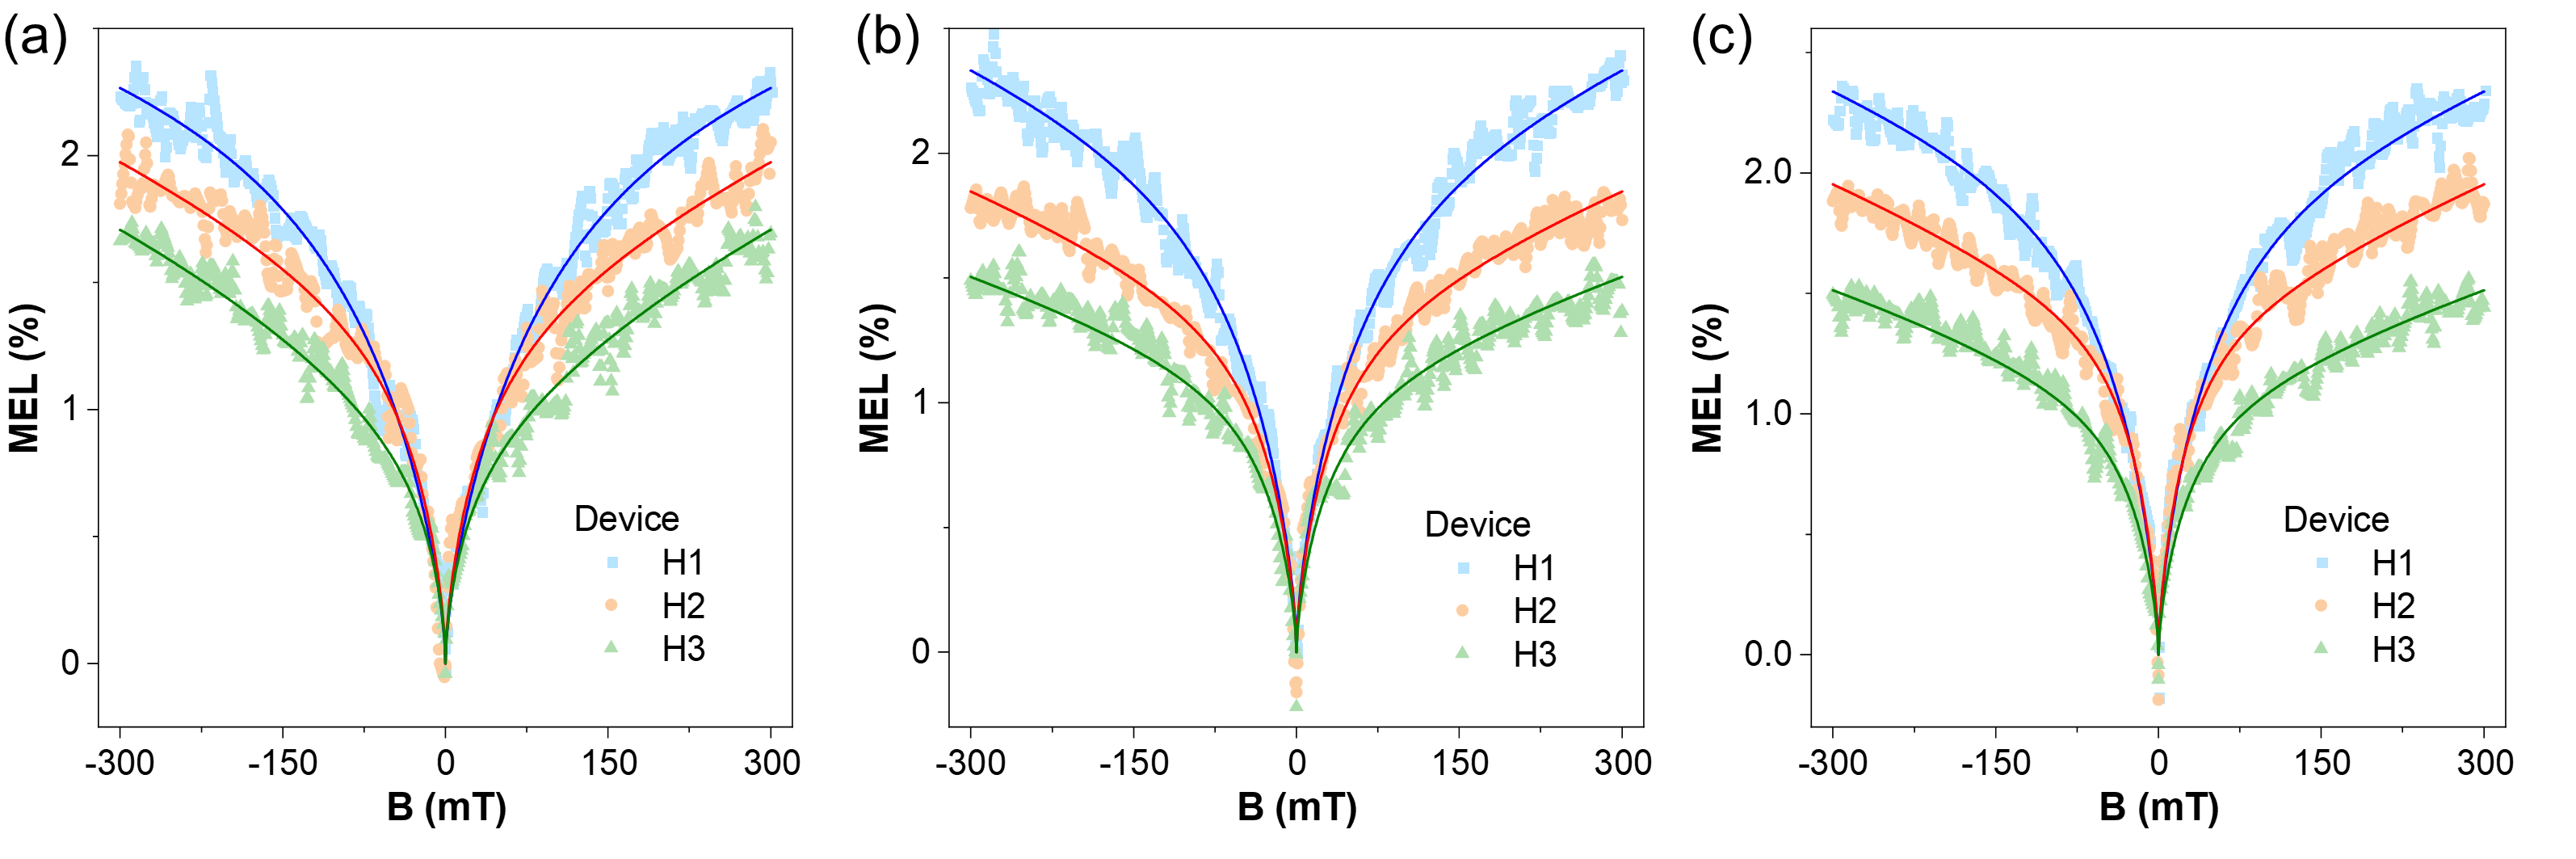


**Figure S9.** The MEL responses of devices H1, H2, and H3 at different current densities of (a) 10 mA cm─2, (b) 15 mA cm─2, and (c) 20 mA cm─2, respectively.

The Δ g factor model:

in which *MEL* is the change of EL intensity as the magnetic field strength changed under constant current, *B* is the magnetic field strength, *A* and *B*0 represent the fitting constant and linewidth at low magnetic field (0-50 mT), respectively, and *C* is the fitting constant at high magnetic field.

**Table S7**. The values of *C* of devices H1, H2, and H3 at different current densities.

| Device | 5 mA cm─2 | 10 mA cm─2 | 15 mA cm─2 | 20 mA cm─2 |
| --- | --- | --- | --- | --- |
| H1 | 0.135 | 0.086 | 0.103 | 0.102 |
| H2 | 0.122 | 0.099 | 0.089 | 0.095 |
| H3 | 0.100 | 0.093 | 0.073 | 0.074 |


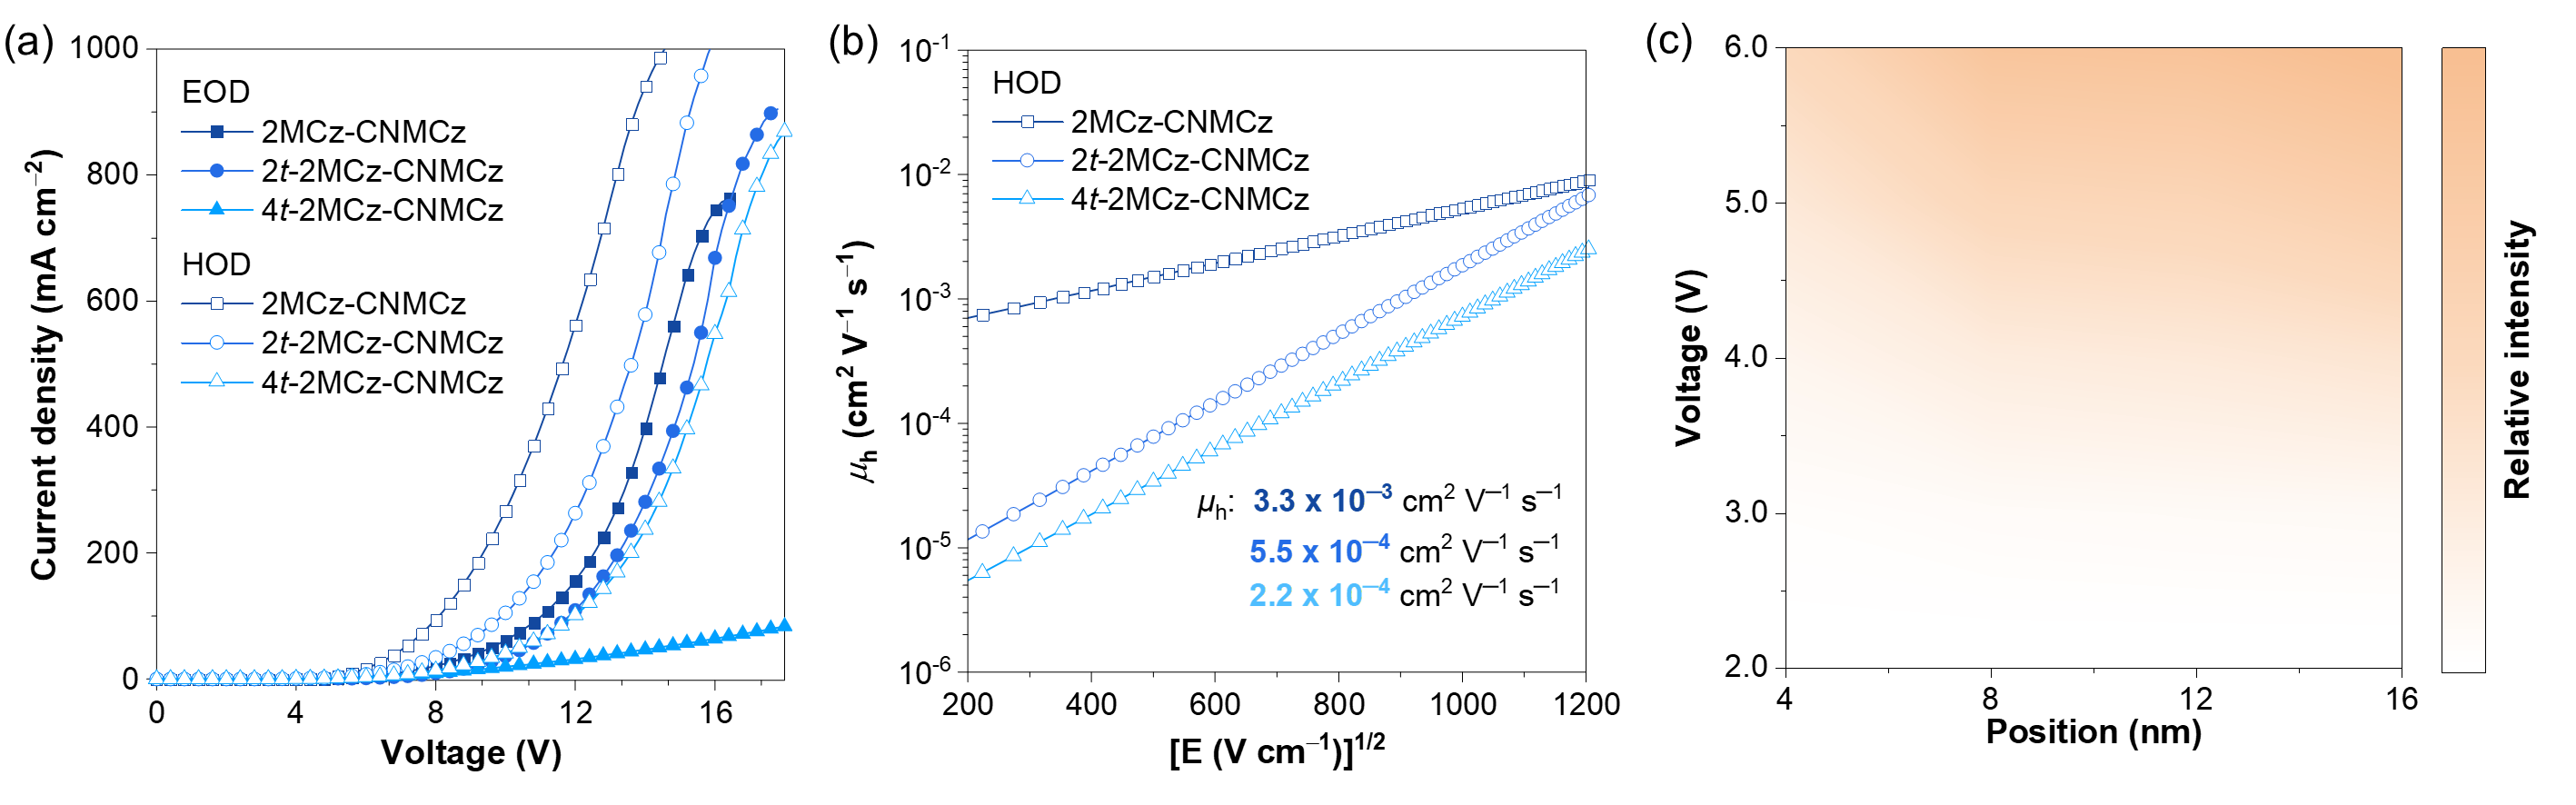


**Figure S10.** (a) Current density-voltage and (b) hole carrier mobilities (*μ*h)-electric field (f) curves of electron-only (EODs) and hole-only devices (HODs) of hot-exciton materials. The EODs and HODs were fabricated with the configuration of ITO/TmPyPB (10 nm)/EML (80 nm)/TmPyPB (10 nm)/LiF (1 nm)/Al (120 nm), and ITO/TAPC (10 nm)/EML (80 nm)/TAPC (10 nm)/Al (120 nm), in which the EML is 2MCz-CNMCz, 2*t*-2MCz-CNMCz, and 4*t*-2MCz-CNMCz, respectively. (c) Relative intensity of TBRb versus position and voltage, in which the position is the distance from TBRb to TcTa.

**Table S8.** The electron carrier and hole carrier mobilities of HE-type donors.

| at *E*=6.4 ×105 V cm─1 | [cm2 V─1 s─1] | [cm2 V─1 s─1] |
| --- | --- | --- |
| 2MCz-CNMCz | 3.5×10─4 | 3.3×10─3 |
| 2*t*-2MCz-CNMCz | 1.2×10─4 | 5.5×10─4 |
| 4*t*-2MCz-CNMCz | 1.9×10─4 | 2.2×10─4 |

# Sensitization performances


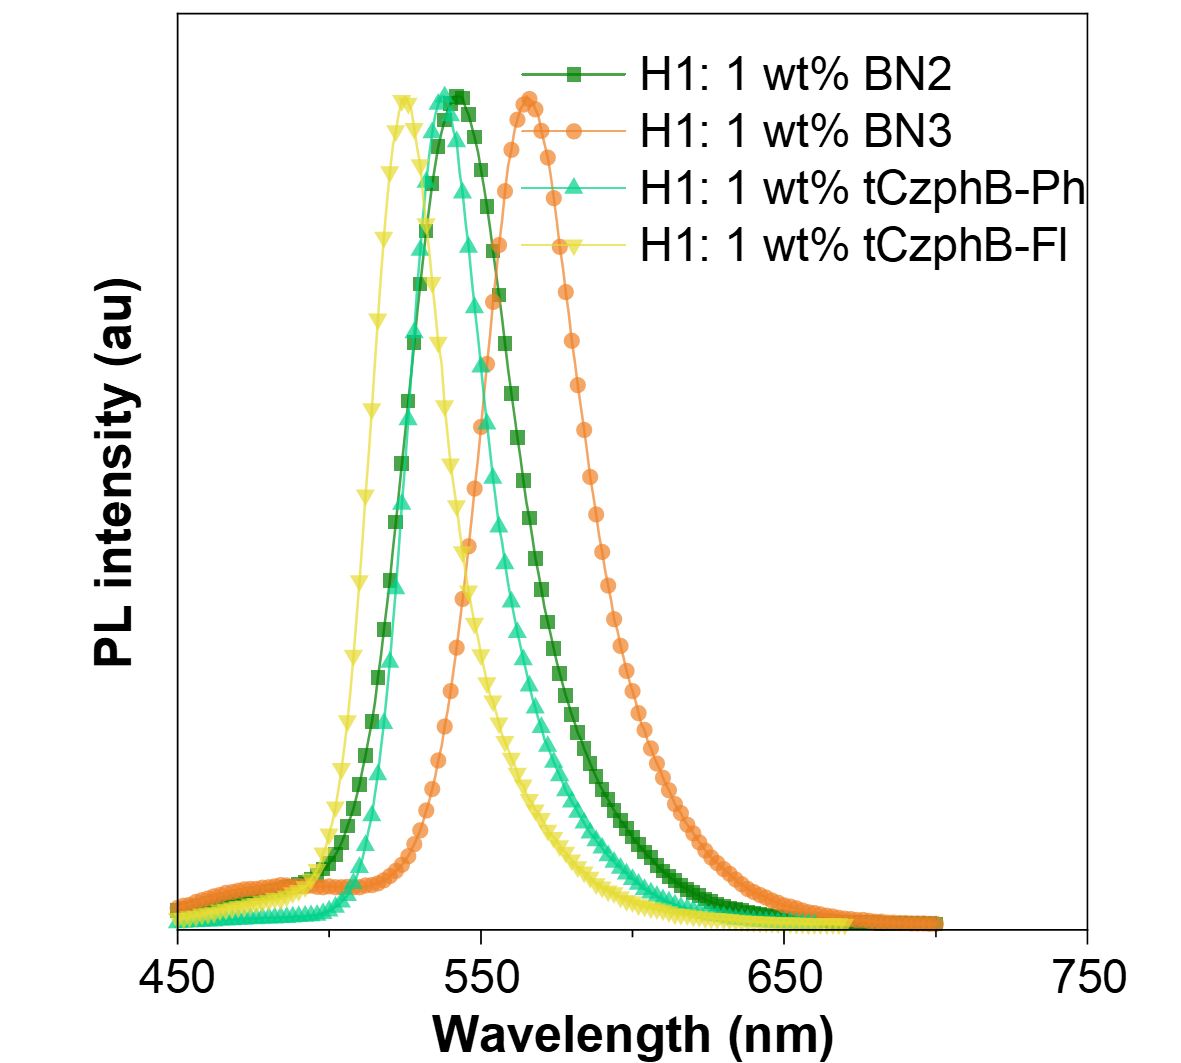


**Figure S11.**The PL spectra of sensitized films.

**Table S9.** EQEmax-*λ*max summary data of OLEDs with high PE.

| *λ*max (nm) | EQEmax (%) | PEmax (lm W-1) | Reference |
| --- | --- | --- | --- |
| 544 | 37.7 | 232.8 | **this work** |
| 568 | 40.5 | 223.5 | **this work** |
| 526 | 30.7 | 176.6 | **this work** |
| 534 | 33.4 | 203.6 | **this work** |
| 536 | 34.4 | 166.3 | Ref.1 |
| 532 | 36.1 | 187.7 | Ref.2 |
| 558 | 40.5 | 205.8 | Ref.3 |
| 560 | 38.7 | 170.7 | Ref.3 |
| 540 | 37.6 | 136.8 | Ref.4 |
| 540 | 41.9 | 197.3 | Ref.5 |

1. **NMR spectroscopy**

**
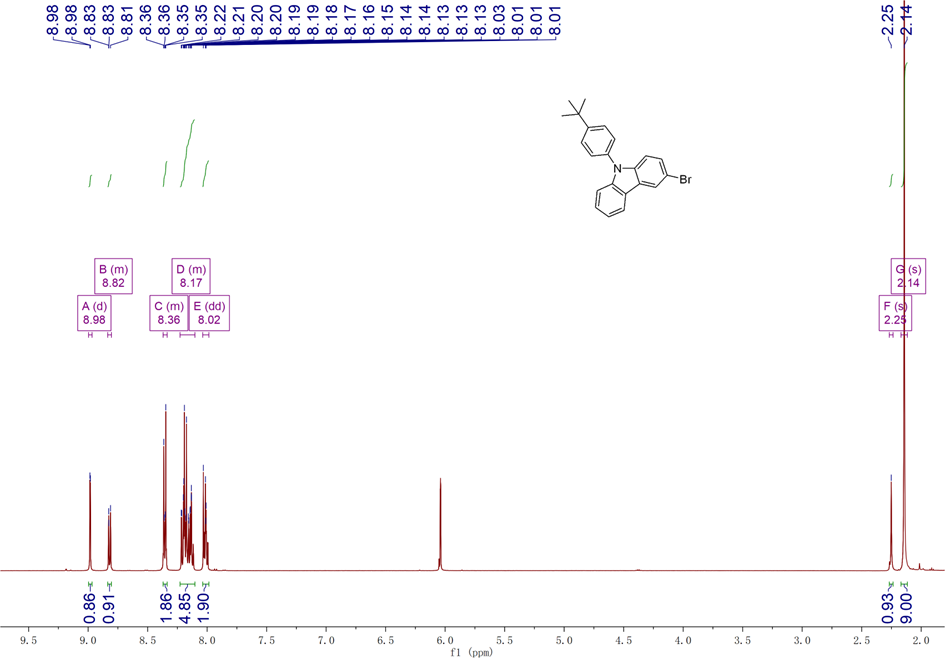
**

**Figure S12.** 1H-NMR Spectrum of 2 in CD2Cl2.

**
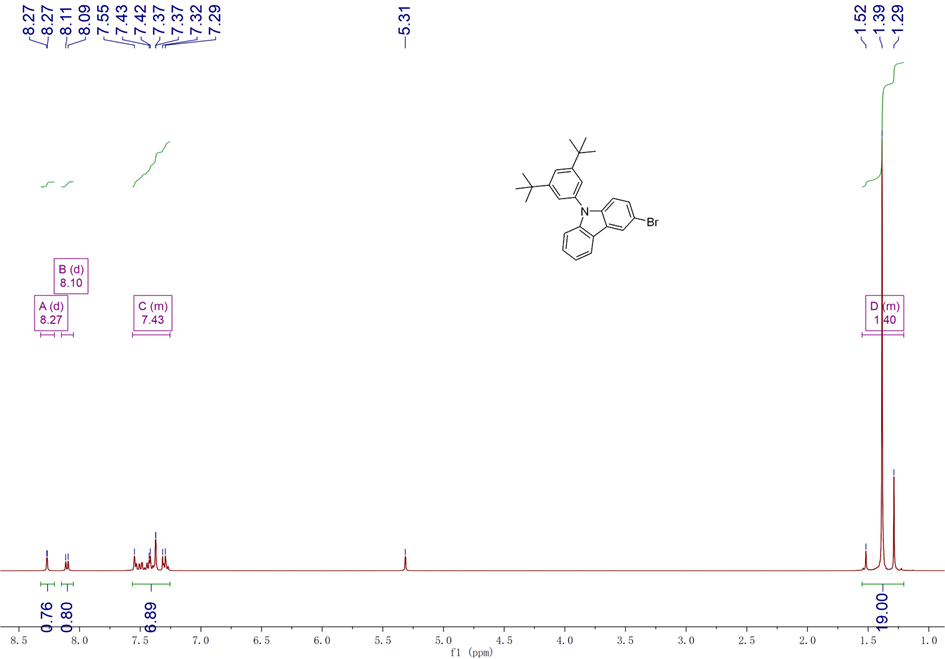
**

**Figure S13.** 1H-NMR Spectrum of 3 in CD2Cl2.


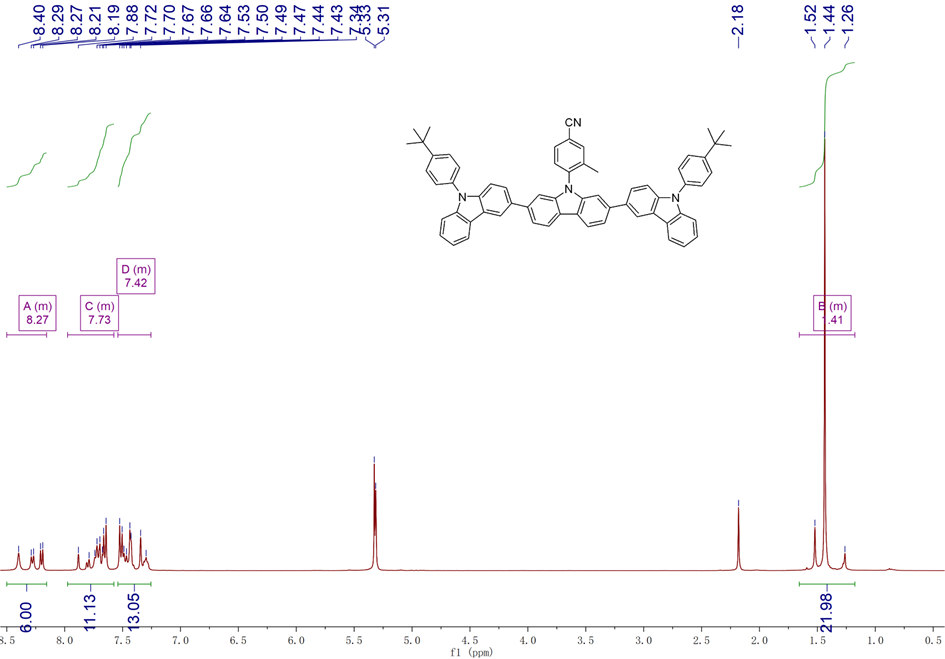


**Figure S14.** 1H-NMR Spectrum of 2*t*-2MCz-CNMCz in CD2Cl2.


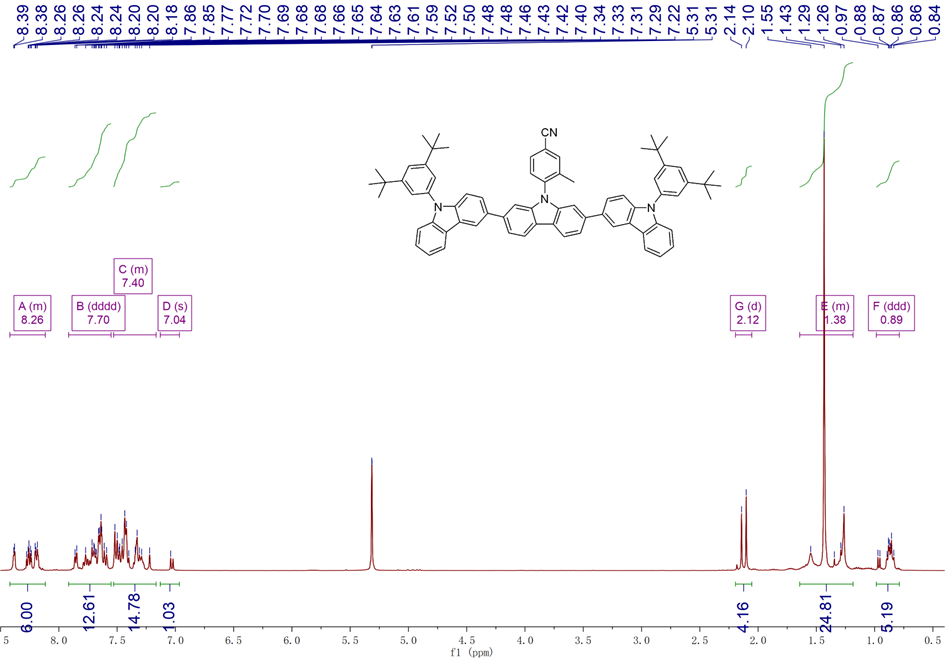


**Figure S15.** 1H-NMR Spectrum of 4*t*-2MCz-CNMCz in CD2Cl2.

1. **References**

[1] Wu, X., Peng, X., Chen, L., Tang, B. Z., & Zhao, Z. Through-space conjugated molecule with dual delayed fluorescence and room temperature phosphorescence for high performance OLEDs, *ACS Mater. Lett.* **5**, 664−672 (2023).

[2] Yin C. et al. Ultra-low power-consumption OLEDs via phosphor-assisted thermally-activateddelayed-fluorescence-sensitized narrowband emission, *Nat. Commun.* **16**, 30 (2025).

[3] Hu Y. X. et al. Efficient selenium-integrated TADF OLEDs with reduced roll-off, *Nat. Photon.* **16**, 803−810 (2022).

[4] Fu, Y., Liu, H., Tang, B. Z., & Zhao, Z. Realizing efficient blue and deep-blue delayed fluorescence materials with record-beating electroluminescence efficiencies of 43.4%, *Nat. Commun.* **14**, 2019 (2023).

[5] Zeng J. et al. Purely organic room-temperature phosphorescence sensitizers for highly efficient hyperfluorescence OLEDs, *Sci. Adv.* **11**, eadt7899 (2025).
